# Supplementary material for: Downstream metabolites of (+)-cis-12-oxo-phytodienoic acid function as noncanonical bioactive jasmonates in Arabidopsis thaliana.
Source: Research Square preprint supplement (doi:10.21203/rs.3.rs-5075946/v1), 2024-10-16
Supplement: Supplementary file 1 [file 669d74ba3570906a326ef55a.pdf]

# Supplementary Materials for

## **Downstream metabolites of (+)-*cis*-12-oxo-phytodienoic acid function as noncanonical bioactive jasmonates in *Arabidopsis thaliana*.**

Minoru Ueda,<sup>1,2\*</sup> Rina Saito,<sup>2, 3</sup> Yuho Nishizato,<sup>1, 3</sup> Tsumugi Kitajima,<sup>2</sup> Nobuki Kato<sup>1</sup>

<sup>1</sup>Department of Chemistry, Graduate School of Science, Tohoku University, Sendai 980-8578, Japan.

<sup>2</sup>Department of Molecular and Chemical Life Sciences, Graduate School of Life Sciences, Tohoku University, Sendai 980-8578, Japan.

<sup>3</sup>These authors contributed equally.

\*Corresponding author. E-mail: minoru.ueda.d2@tohoku.ac.jp

### **This PDF file includes:**

Figs. S1 to S6

Tables S1

Supplementary Text

Supplementary References

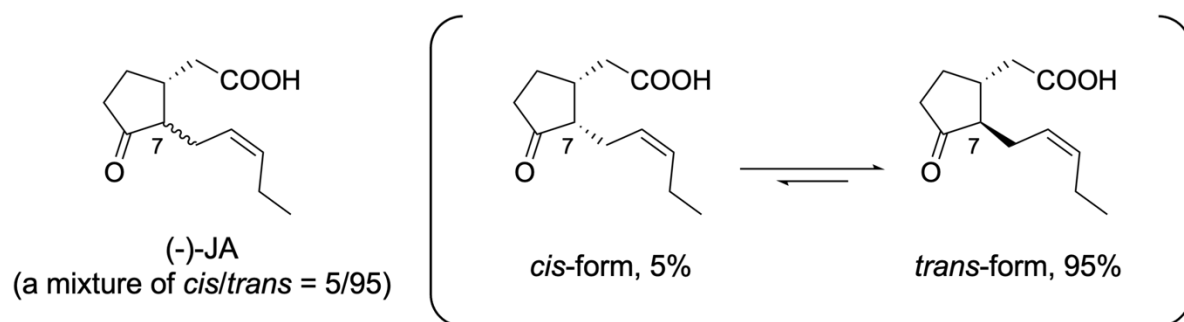

**Fig. S1. Chemical structure of (-)-JA used in this study.** A *cis*-form and a *trans*-form are in equilibrium in chemically synthesized (-)-JA.

**A** JA-Ile (1  $\mu$ M)

IP: Anti-Fluorescein, WB: Anti-GST

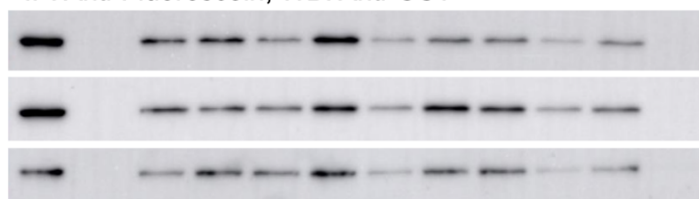

|           |       |   |   |   |   |   |     |   |    |    |    |    |
|-----------|-------|---|---|---|---|---|-----|---|----|----|----|----|
| GST-AtCOI | Input | + | + | + | + | + | +   | + | +  | +  | +  | +  |
| FI-AtJAZP | -     | - | 1 | 2 | 3 | 4 | 5/6 | 9 | 10 | 11 | 12 | 13 |

**B** *cis*-OPDA (1  $\mu$ M)

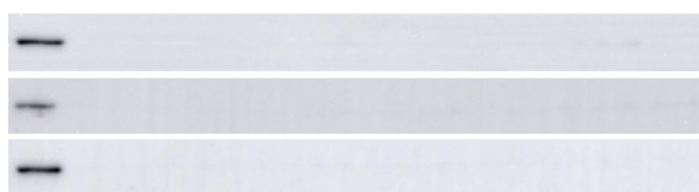

|           |       |   |   |   |   |   |     |   |    |    |    |    |
|-----------|-------|---|---|---|---|---|-----|---|----|----|----|----|
| GST-AtCOI | Input | + | + | + | + | + | +   | + | +  | +  | +  | +  |
| FI-AtJAZP | -     | - | 1 | 2 | 3 | 4 | 5/6 | 9 | 10 | 11 | 12 | 13 |

**C** *cis*-OPDA (30  $\mu$ M)

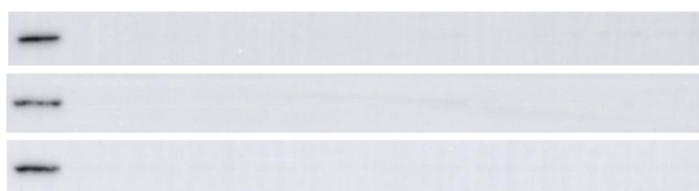

|           |       |   |   |   |   |   |     |   |    |    |    |    |
|-----------|-------|---|---|---|---|---|-----|---|----|----|----|----|
| GST-AtCOI | Input | + | + | + | + | + | +   | + | +  | +  | +  | +  |
| FI-AtJAZP | -     | - | 1 | 2 | 3 | 4 | 5/6 | 9 | 10 | 11 | 12 | 13 |

**Fig. S2. Results of three independent replications are shown in Figure 2I.** Pulldown assay of GST-AtCOI1 with FI-AtJAZPs in the presence of JA-Ile (1  $\mu$ M, **A**), *cis*-OPDA (1  $\mu$ M, **B**), or *cis*-OPDA (30  $\mu$ M, **C**).

**A** JA-Ile (1  $\mu$ M)

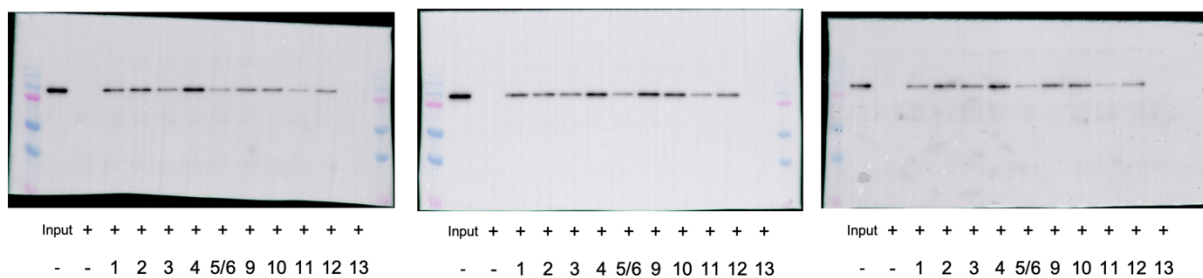

**B** *cis*-OPDA (1  $\mu$ M)

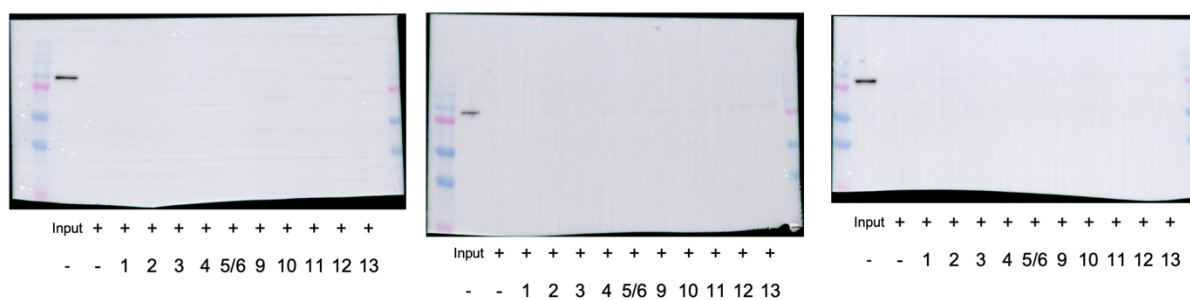

**C** *cis*-OPDA (30  $\mu$ M)

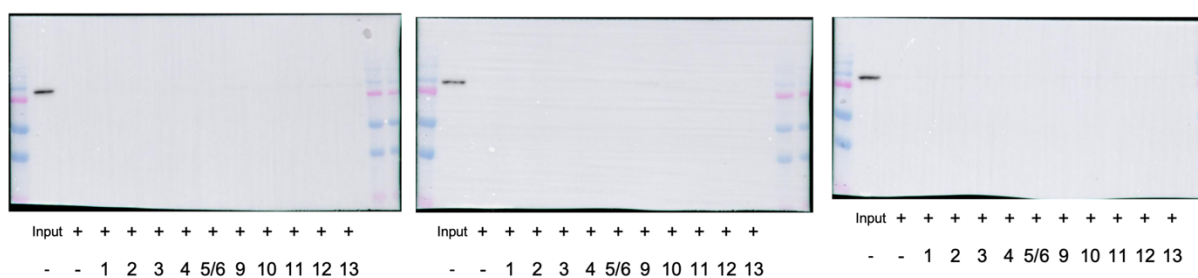

**Fig. S3. Uncropped images of Figure S2.** Pulldown assay of GST-*At*COI1 with Fl-*At*JAZPs in the presence of JA-Ile (1  $\mu$ M, **A**), *cis*-OPDA (1  $\mu$ M, **B**), or *cis*-OPDA (30  $\mu$ M, **C**).

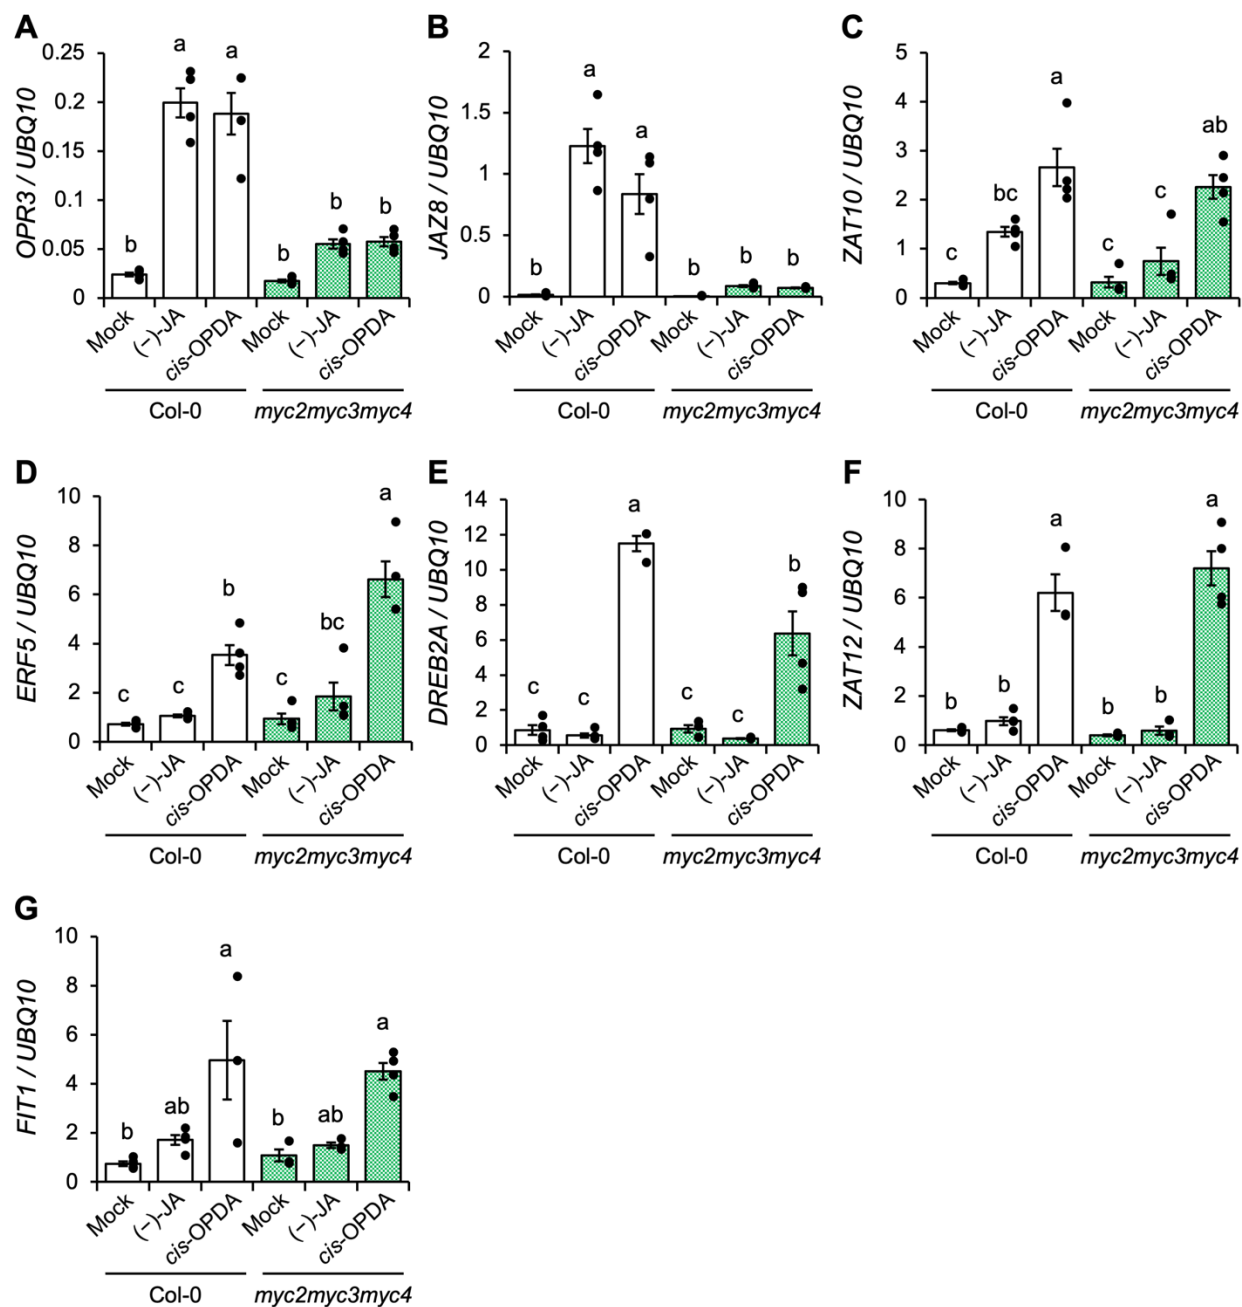

**Fig. S4. Gene expression analysis induced by *cis*-OPDA in WT and *myc2myc3myc4* mutant.** Gene expression analysis by RT-qPCR in 10-day-old WT (Col-0, white bar) and *myc2myc3myc4* mutant (green bar) with or without compounds ((-)-JA, *cis*-OPDA, 30  $\mu$ M) treatment for 30 min. The results are mean with s.d. (n = 3–4). Samples were normalized to the *UBQ10* level. Significant differences were evaluated by ANOVA/Tukey Kramer test ( $p < 0.05$ ). Experiments were repeated three times with similar results.

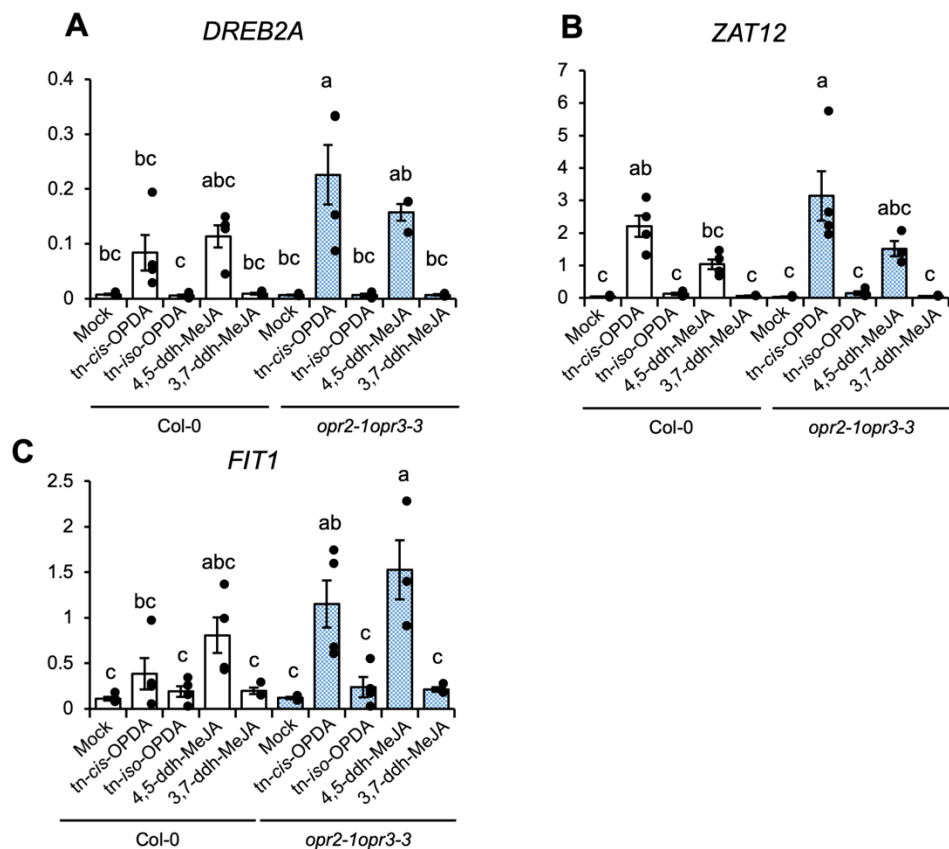

**Fig. S5. tn-cis-OPDA and 4,5-ddh-MeJA mediated gene expression of *DREB2A*, *ZAT12*, and *FIT1* through their electrophilic properties.** (A-C) Gene expression analysis by RT-qPCR in 10-day-old WT (Col-0, white bar) and *opr2-1opr3-3* mutant (blue bar) or without any treatments (mock) or treated with 30  $\mu$ M tn-cis-OPDA, tn-iso-OPDA, 4,5-ddh-MeJA, and 3,7-ddh-MeJA for 30 min. The data are presented as mean  $\pm$  SD (n = 3–4). Samples were normalized to the *UBQ10* level. Significant differences were evaluated by the ANOVA/Tukey Kramer test ( $p < 0.05$ ). The experiments were repeated three times with similar results.

**Table S1. Gene sequences of all primers for RT-qPCR experiments used in this study.**

| Primer for RT-qPCR  | Sequence                     |
|---------------------|------------------------------|
| <i>UBQ10_Fw</i>     | GGCCTTGTATAATCCCTGATGAATAAG  |
| <i>UBQ10_Rv</i>     | AAAGAGATAACAGGAACGGAAACATAGT |
| <i>OPR3_Fw</i>      | CGGTTCAAGATTGATGGAGA         |
| <i>OPR3_Rv</i>      | CGATTATCAAACCTCAGAGGC        |
| <i>JAZ8_Fw</i>      | CGGGTCGGATCCTCCAAAC          |
| <i>JAZ8_Rv</i>      | CGTCGTGAATGGTACGGTGAAG       |
| <i>MYC2_Fw</i>      | GTGCGGGATTAGCTGGTAAA         |
| <i>MYC2_Rv</i>      | ATGCATCCCAAACACTCCTC         |
| <i>ZAT10_Fw</i>     | CTCGGTTTGACTTTCCGGTCA        |
| <i>ZAT10_Rv</i>     | CAGTCAACAAATTCCTACACAACCTCTC |
| <i>ERF5_Fw</i>      | CCGCTTCTGTCGCCGTTATC         |
| <i>ERF5_Rv</i>      | CGTCCACGTCAGCATACACATC       |
| <i>DREB2A_Fw</i>    | GTTGCCAACGGTTCATACAG         |
| <i>DREB2A_Rv</i>    | CGTCGAAGAATCCATTACCATC       |
| <i>ZAT12_Fw</i>     | CACGGTGACTACGTTGAAGAAATC     |
| <i>ZAT12_Rv</i>     | CTCCAACCTTGAGATTCAAATTGTC    |
| <i>FIT1_Fw</i>      | CTCCTTCTCCGGACACATACC        |
| <i>FIT1_Rv</i>      | CCTTGATTTAAAAGTGATCCAGTG     |
| <i>HSP17.6A_Fw</i>  | TCCTCCTGAGCCAAAGAAACC        |
| <i>HSP17.6A_Rv</i>  | CAACGAACACCAAGAGGTAG         |
| <i>HSP17.4_Fw</i>   | GTATGGAGAATGGGGTGTTGTCG      |
| <i>HSP17.4_Rv</i>   | GCTTTCCAACCTTCAGAGTTCCTC     |
| <i>HSP17.6II_Fw</i> | CTTCCTCCTCCGGAACCAAAG        |
| <i>HSP17.6II_Rv</i> | CCATATCCCTCACGCATTCC         |

## Supplementary Text

### General procedures of chemical syntheses

All chemical reagents and solvents were obtained from commercial suppliers (Kanto Chemical Co. Ltd., Wako Pure Chemical Industries Co. Ltd., Nacalai Tesque Co. Ltd., Tokyo Chemical Industry Co. Ltd., Sigma-Aldrich Co. LLC.) and used without further purification. All anhydrous solvents were either dried by standard techniques and freshly distilled before use or purchased in anhydrous form and used as supplied. Reversed-phase high-performance liquid chromatography (HPLC) was carried out on a PU-4180 plus pump equipped with UV-4075 and MD-4010 detectors (JASCO, Tokyo, Japan).  $^1\text{H}$  and  $^{13}\text{C}$  NMR spectra were recorded on a JNM-ECS-400 spectrometer (JEOL, Tokyo, Japan) in deuterated chloroform using TMS as an internal standard. Fourier transform infrared (FT/IR) spectra were recorded on an FT/IR-4100 (JASCO, Tokyo, Japan). High-resolution (HR) electrospray ionization (ESI)-mass spectrometry (MS) analyses were conducted using a microTOF II (Bruker Daltonics Inc., MA, USA). Optical rotations were measured using a JASCO P-2200 polarimeter (JASCO, Tokyo, Japan). Flash chromatography was performed on an Isolera system (Biotage Ltd., North Carolina, USA). TLC analyses were performed on Silica gel F254 (0.25 mm or 0.5 mm, MERCK, Germany) or RP-18F254S (0.25 mm, MERCK). All reactions were carried out under air unless stated otherwise.



**Synthesis of (+)-*cis*-OPDA-*d*<sub>5</sub>:**

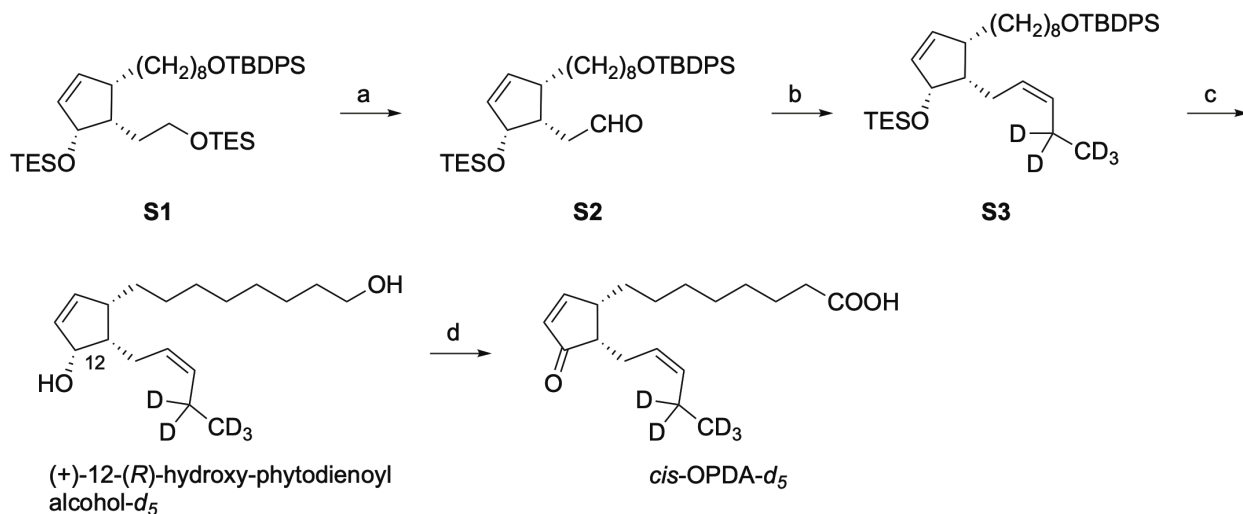

**Scheme S1. Synthesis of (+)-*cis*-OPDA-*d*<sub>5</sub>.** Reagents and conditions: (a) (COCl)<sub>2</sub>, DMSO, CH<sub>2</sub>Cl<sub>2</sub>; NEt<sub>3</sub>; (b) [Ph<sub>3</sub>PCH<sub>2</sub>CD<sub>2</sub>CD<sub>3</sub>]<sup>+</sup>Br<sup>-</sup>, NaHMDS, THF, 57% (2 steps); (c) TBAF, THF, reflux, 94%; (d) Jones reagent, acetone, -20 °C, 42%.

**Synthesis of diene S3.** To a solution of DMSO (147 μL, 2.07 mmol) in CH<sub>2</sub>Cl<sub>2</sub> (1.5 mL) was added oxalyl chloride (83.3 μL, 971 μmol) at -78 °C under an argon atmosphere. After the reaction mixture was stirred at -78 °C for 10 min, a solution of S4 (134 mg, 185 μmol) in CH<sub>2</sub>Cl<sub>2</sub> (1.7 mL) was slowly added. After stirring the reaction mixture at -65 °C for 1 h, Et<sub>3</sub>N (287 μL, 2.06 mmol) was slowly added. After the reaction mixture was stirred at -65 °C for 3 h, the mixture was gradually warmed to room temperature with stirring. The reaction mixture was quenched with saturated aqueous NH<sub>4</sub>Cl. The mixture was extracted with *n*-hexane. The organic layer was washed with saturated aqueous NaCl, dried over Na<sub>2</sub>SO<sub>4</sub>, and filtered. The reaction mixture was concentrated under reduced pressure to afford the crude S5 (123 mg) as a pale yellow oil. The crude product was used for the following reaction without further purification.

To an ice-cold suspension of [Ph<sub>3</sub>PCH<sub>2</sub>CD<sub>2</sub>CD<sub>3</sub>]<sup>+</sup>Br<sup>-</sup> (277 mg, 708 μmol) in THF (2.6 mL) was added NaHMDS (343 μL, 1.9 M in THF, 652 μmol). The resulting orange-red mixture was stirred at room temperature for 40 min and cooled to -78 °C. To this solution was added a solution of the above aldehyde in THF (2.5 mL) dropwise. The resulting solution was stirred at -78 °C for 2 h and added DMF (401 μL), then at room temperature for 2 h, quenched with saturated NH<sub>4</sub>Cl,

extracted with *n*-hexane. The combined organic layers were dried over Na<sub>2</sub>SO<sub>4</sub> and concentrated under reduced pressure. The residue was purified by medium-pressure chromatography (Isolera, eluent: *n*-hexane/EtOAc = 99:1 to *n*-hexane/EtOAc = 90:10) to give **S1-*d*<sub>5</sub>** (66.7 mg, 57% in 2 steps) as a colorless oil.  $[\alpha]_D^{26} +0.37$  (*c* 0.99, CHCl<sub>3</sub>). <sup>1</sup>H NMR (400 MHz, CDCl<sub>3</sub>)  $\delta_H$ : 7.69-7.64 (m, 4H), 7.42-7.28 (m, 6H), 6.12 (dd, *J* = 5.7, 2.6 Hz, 1H), 5.84 (ddd, *J* = 5.7, 2.4, 1.2 Hz, 1H), 5.44 (dt, *J* = 10.8, 6.8 Hz, 1H), 5.35 (d, *J* = 10.8 Hz, 1H), 4.50 (dd, *J* = 6.8, 2.4 Hz, 1H), 3.64 (t, *J* = 6.6 Hz, 2H), 2.39 (brs, 1H), 2.20 (t, *J* = 6.8 Hz, 2H), 1.97 (dt, *J* = 13.6, 6.8 Hz 1H), 1.59-1.50 (m, 8H), 1.29-1.18 (m, 6H), 1.04 (s, 9H), 0.95 (t, *J* = 7.0 Hz, 9H), 0.57 (q, *J* = 7.0 Hz, 6H); <sup>13</sup>C NMR (100 MHz, CDCl<sub>3</sub>)  $\delta_C$ : 140.24, 135.6, 134.2, 132.7, 131.6, 129.5, 128.8, 127.6, 76.3, 64.0, 47.3, 46.0, 32.6, 32.4, 30.0, 29.7, 29.4, 28.0, 26.9, 25.8, 23.2, 22.6, 7.0, 5.2 (deuterated carbons were not detected); IR (neat) cm<sup>-1</sup>: 2930, 1462, 1110, 739; HRMS (ESI, positive) *m/z* [M+Na]<sup>+</sup> Calcd. for C<sub>40</sub>H<sub>59</sub>D<sub>5</sub>NaO<sub>2</sub>Si<sub>2</sub>: 660.4651, Found: 660.4641.

**Synthesis of (+)-12-(*R*)-hydroxy-phytodienoyl alcohol-*d*<sub>5</sub>.** To a solution of the above olefin **S1-*d*<sub>5</sub>** (66.7 mg, 105  $\mu$ mol) in THF (15 mL) was added TBAF (1.8 mL, 1.0 M in THF, 1.8 mmol). The solution was heated under reflux for 2 h. After being cooled to room temperature, the solvent was removed under reduced pressure. The residue was purified by medium-pressure chromatography (Isolera, eluent: *n*-hexane/EtOAc = 90:10 to *n*-hexane/EtOAc = 20:10) to give (+)-12-(*R*)-hydroxy-phytodienoyl alcohol-*d*<sub>5</sub> (28.1 mg, 94%) as a colorless oil.  $[\alpha]_D^{23} +35.5$  (*c* 1.11, CHCl<sub>3</sub>). <sup>1</sup>H NMR (400 MHz, CDCl<sub>3</sub>)  $\delta_H$ : 6.23 (dd, *J* = 5.8, 2.8 Hz, 1H), 5.96 (ddd, *J* = 5.8, 2.2, 1.4 Hz, 1H), 5.46 (dt, *J* = 11.0, 5.5 Hz, 1H), 5.42 (d, *J* = 11.0 Hz, 1H), 4.51 (brs, 1H), 3.64 (t, *J* = 6.6 Hz, 2H), 2.43-2.51 (m, 1H), 2.36-2.29 (m, 1H), 2.22-2.16 (m, 1H), 2.12-2.05 (m, 1H), 1.46-1.04 (m, 14H); <sup>13</sup>C NMR (100 MHz, CDCl<sub>3</sub>)  $\delta_C$ : 141.82, 132.43, 132.07, 128.06, 76.66, 63.07, 46.22, 46.10, 33.64, 32.82, 29.92, 29.62, 29.45, 28.15, 25.78, 23.15, 19.92 (quintet, *J*<sub>C-D</sub> = 18.8 Hz), 13.20 (septet, *J*<sub>C-D</sub> = 19.3 Hz); IR (neat) cm<sup>-1</sup>: 3350, 2855, 2927, 1057; HRMS (ESI, positive) *m/z* [M+Na]<sup>+</sup> Calcd. for C<sub>18</sub>H<sub>27</sub>D<sub>5</sub>NaO<sub>2</sub>: 308.2614, Found: 308.2604.

**Synthesis of (+)-*tn-cis*-OPDA:**

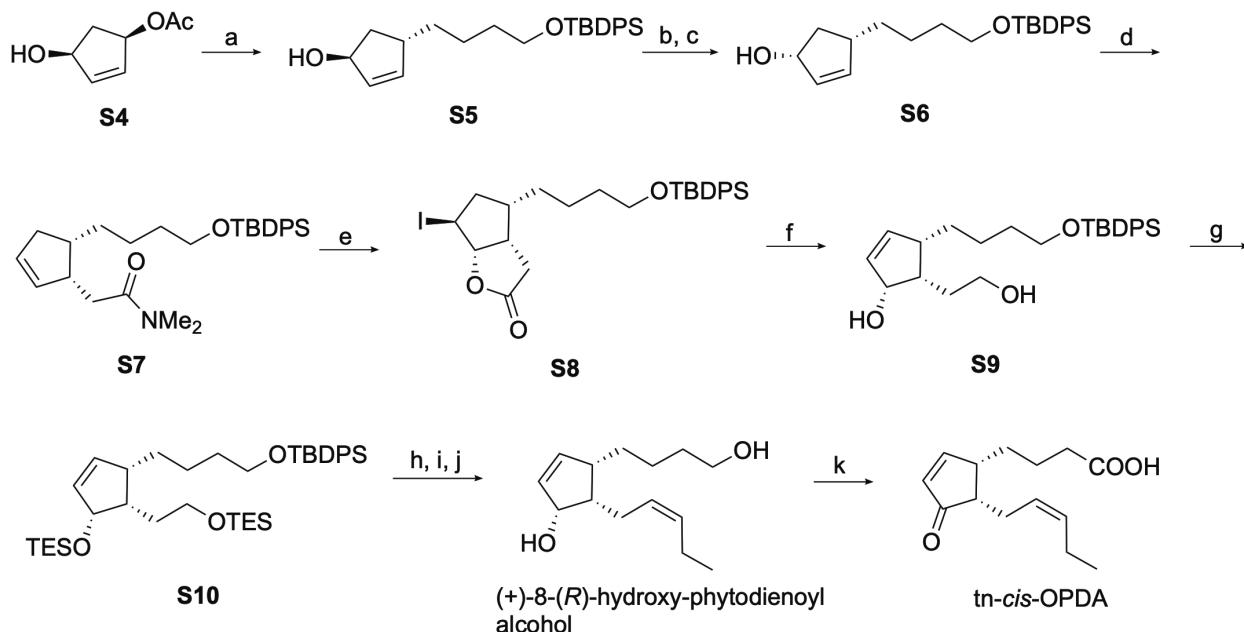

**Scheme S2. Synthesis of (+)-*tn-cis*-OPDA.** *Reagents and conditions:* (a) TBDPSO(CH<sub>2</sub>)<sub>4</sub>MgCl, CuCN, THF, -18 °C, 83%; (b) Ph<sub>3</sub>P, AcOH, DIAD, toluene, -78 °C; (c) LiOH, H<sub>2</sub>O, MeOH, THF, 44% (2 steps); (d) MeC(OMe)<sub>2</sub>NMe<sub>2</sub>, xylene, reflux, 67%; (e) I<sub>2</sub>, buffer (pH 6.0), THF, 78%; (f) DBU, THF, reflux; LiAlH<sub>4</sub>, -30 °C, 55%; (g) TESCl, imidazole, DMF, 82%; (h) (COCl)<sub>2</sub>, DMSO, CH<sub>2</sub>Cl<sub>2</sub>, -78 °C; NEt<sub>3</sub>; (i) Ph<sub>3</sub>P<sup>+</sup>CH<sub>2</sub>CH<sub>2</sub>CH<sub>3</sub>Br<sup>-</sup>, NaHMDS, DMF, THF; (j) TBAF, THF, reflux, 66% (3 steps); (k) Jones reagent, acetone, -20 °C, 96%.

**Synthesis of cyclopentenol S5.** To CuCN (222 mg, 2.47 mmol) was added TBDPSO(CH<sub>2</sub>)<sub>4</sub>MgCl (1.22 M in THF, 14 mL, 37.7 mmol) (3) slowly at -30 °C under an argon atmosphere. After 10 min stirring at -30 °C, acetate **S4** (1.74 g, 12.2 mmol) in THF (26 mL) was added dropwise. The mixture was warmed to -18 °C over 90 min and quenched by saturated aqueous NH<sub>4</sub>Cl. The water layer was extracted with EtOAc. The combined organic layers were washed with saturated aqueous NaCl, dried over Na<sub>2</sub>SO<sub>4</sub>, and filtered. The residue was purified by medium-pressure chromatography (Isolela, eluent: *n*-hexane/EtOAc = 94:6 to *n*-hexane/EtOAc = 50:50) to give **S10** (4.01 g, 83%) as a yellow oil. [α]<sub>D</sub><sup>27</sup> -62.6 (*c* 1.03, CHCl<sub>3</sub>); <sup>1</sup>H NMR (400 MHz, CDCl<sub>3</sub>) δ<sub>H</sub>: 7.72-

7.60 (m, 4H), 7.47-7.32 (m, 6H), 5.94 (ddd,  $J = 5.7, 2.1, 0.5$  Hz, 1H), 5.82 (dt,  $J = 5.7, 2.1$  Hz, 1H), 4.90-4.79 (m, 1H), 3.65 (t,  $J = 6.4$  Hz, 2H), 2.90-2.78 (m, 1H), 1.90 (ddd,  $J = 14.1, 7.6, 2.8$  Hz, 1H), 1.75 (ddd,  $J = 14.1, 7.1, 5.3$  Hz, 1H), 1.61-1.51 (m, 2H), 1.43-1.18 (m, 4H), 1.05 (s, 9H);  $^{13}\text{C}$  NMR (100 MHz,  $\text{CDCl}_3$ )  $\delta_{\text{C}}$ : 140.38, 135.73, 134.23, 132.57, 129.66, 127.73, 77.34, 63.90, 44.17, 40.74, 35.70, 32.76, 27.00, 24.26, 19.36; IR (neat)  $\text{cm}^{-1}$ : 3330, 3070, 1110, 823; HRMS (ESI, positive)  $m/z$   $[\text{M}+\text{Na}]^+$  Calcd. for  $\text{C}_{25}\text{H}_{34}\text{NaO}_2\text{Si}$ : 417.2220, Found: 417.2210.

**Synthesis of cyclopentenol S6.** To a solution of alcohol **S5** (4.01 g, 10.2 mmol),  $\text{Ph}_3\text{P}$  (4.50 g, 17.2 mmol), and AcOH (1 mL, 17.5 mmol) in toluene (88 mL) was added DIAD (6 mL, 28.0 mmol) at  $-78^\circ\text{C}$  under an argon atmosphere. The reaction was carried out at the same temperature for 3 h and quenched with saturated aqueous  $\text{NaHCO}_3$ . After being vigorously stirred at room temperature, the water layer was extracted with *n*-hexane. The combined organic layers were washed with saturated aqueous NaCl, dried over  $\text{Na}_2\text{SO}_4$ , and filtered. The residue was roughly purified by medium-pressure chromatography (Isolela, eluent: 98:2 *n*-hexane/EtOAc to 80:20 *n*-hexane/EtOAc) to give the mixture as a colorless oil (2.45 g). To a solution of the mixture (2.45 g) in MeOH (24 mL) and THF (55 mL) was added 1M LiOH in  $\text{H}_2\text{O}$  (22.5 mL, 22.5 mmol). After stirring at room temperature for 2.5 h, the organic solvent was removed under reduced pressure. The resulting mixture was extracted with  $\text{Et}_2\text{O}$ . The combined organic layers were washed with saturated aqueous NaCl, dried over  $\text{Na}_2\text{SO}_4$ , and filtered. The residue was purified by medium-pressure chromatography (Isolela, eluent: *n*-hexane/EtOAc = 93:7 to *n*-hexane/EtOAc = 40:60) to give **S6** (1.77 g, 44% in 2 steps) as a yellow oil.  $[\alpha]_{\text{D}}^{26} -10.5$  ( $c$  0.85,  $\text{CHCl}_3$ );  $^1\text{H}$  NMR (400 MHz,  $\text{CDCl}_3$ )  $\delta_{\text{H}}$ : 7.72-7.60 (m, 4H), 7.47-7.32 (m, 6H), 5.87 (dt,  $J = 5.6, 1.6$  Hz, 1H), 5.77 (dt,  $J = 5.6, 2.0$  Hz, 1H), 4.85-4.75 (m, 1H), 3.66 (t,  $J = 6.4$  Hz, 2H), 2.58-2.42 (m, 2H), 1.61-1.51 (m, 2H), 1.50-1.15 (m, 5H), 1.05 (s, 9H);  $^{13}\text{C}$  NMR (100 MHz,  $\text{CDCl}_3$ )  $\delta_{\text{C}}$ : 138.82, 135.73, 134.24, 133.09, 129.66, 127.74, 77.36, 63.94, 44.56, 40.62, 36.71, 32.75, 27.01, 24.20, 19.36; IR (neat)  $\text{cm}^{-1}$ : 3336, 3049, 1110, 823; HRMS (ESI, positive)  $m/z$   $[\text{M}+\text{Na}]^+$  Calcd. for  $\text{C}_{25}\text{H}_{34}\text{NaO}_2\text{Si}$ : 417.2220, Found: 417.2214.

**Synthesis of *N,N*-dimethyl acetamide S7.** A solution of alcohol **S6** (1.77g, 4.49 mmol) and  $\text{MeC(OMe)}_2\text{NMe}_2$  (90% purity, 3.8 mL, 23.4 mmol) in xylene (55 mL) was stirred at reflux temperature for 4 h under an argon atmosphere, added  $\text{MeC(OMe)}_2\text{NMe}_2$  (90% purity, 4 mL, 24.6

mmol) again, and stirred at reflux temperature for an additional 6 h. The solvent was removed under reduced pressure. The residue was purified by medium-pressure chromatography (Isolela, eluent: *n*-hexane/EtOAc = 95:5 to *n*-hexane/EtOAc = 60:40) to give **S7** (1.40 g, 67%) as a brown oil.  $[\alpha]_D^{26}$  -56.6 (*c* 0.87, CHCl<sub>3</sub>); <sup>1</sup>H NMR (400 MHz, CDCl<sub>3</sub>)  $\delta_H$ : 7.72-7.60 (m, 4H), 7.47-7.32 (m, 6H), 5.85-5.78 (m, 1H), 5.76-5.70 (m, 1H), 3.66 (t, *J* = 6.4 Hz, 2H), 3.15-3.02 (m, 1H), 2.96 (s, 3H), 2.94 (s, 3H), 2.44-2.18 (m, 3H), 2.10 (dd, *J* = 14.6, 10.2 Hz, 1H), 1.95 (ddq, *J* = 15.9, 8.5, 2.4 Hz, 1H), 1.68-1.16 (m, 6H), 1.04 (s, 9H); <sup>13</sup>C NMR (100 MHz, CDCl<sub>3</sub>)  $\delta_C$ : 172.61, 135.77, 135.52, 134.06, 130.21, 129.47, 127.53, 63.87, 43.45, 41.29, 37.42, 37.10, 35.42, 33.17, 32.82, 30.30, 26.87, 24.95, 19.21; IR (neat) cm<sup>-1</sup>: 3049, 1652, 1111, 823; HRMS (ESI, positive) *m/z* [M+Na]<sup>+</sup> Calcd. for C<sub>29</sub>H<sub>41</sub>NNaO<sub>2</sub>Si; 486.2799, Found: 486.2790.

**Synthesis of Iodo lactone S8.** To a solution of acetamide **S7** (1.40 g, 3.01 mmol) in THF (22 mL) and buffer (pH 6.0, 22 mL) was added I<sub>2</sub> (1.53 g, 6.03 mmol). The solution was stirred at room temperature for 16 h and quenched with saturated Na<sub>2</sub>S<sub>2</sub>O<sub>3</sub>. The water layer was extracted with Et<sub>2</sub>O. The combined organic layers were washed with saturated aqueous NaCl, dried over Na<sub>2</sub>SO<sub>4</sub>, and filtered. The residue was purified by medium-pressure chromatography (Isolela, eluent: *n*-hexane/EtOAc = 95:5 to *n*-hexane/EtOAc = 60:40) to give **S8** (1.33 g, 79 %) as a pale yellow solid.  $[\alpha]_D^{25}$  +4.1 (*c* 0.94, CHCl<sub>3</sub>); <sup>1</sup>H NMR (400 MHz, CDCl<sub>3</sub>)  $\delta_H$ : 7.72-7.60 (m, 4H), 7.47-7.32 (m, 6H), 5.26 (d, *J* = 6.4 Hz, 1H), 4.45 (d, *J* = 5.2 Hz, 1H), 3.67 (t, *J* = 6.2 Hz, 2H), 3.15-3.03 (m, 1H), 2.73-2.58 (m, 1H), 2.57 (dd, *J* = 18.8, 10.0 Hz, 1H), 2.47 (dd, *J* = 18.8, 3.6 Hz, 1H), 2.07 (dd, *J* = 14.8, 6.0 Hz, 1H), 1.68-1.23 (m, 7H), 1.05 (s, 9H); <sup>13</sup>C NMR (100 MHz, CDCl<sub>3</sub>)  $\delta_C$ : 176.61, 135.65, 134.02, 129.70, 127.73, 92.81, 63.56, 40.39, 40.19, 38.86, 32.55, 29.77, 28.75, 28.23, 26.97, 24.72, 19.29; IR (film) cm<sup>-1</sup>: 2931, 1786, 1111, 823; HRMS (ESI, positive) *m/z* [M+Na]<sup>+</sup> Calcd. for C<sub>27</sub>H<sub>35</sub>INaO<sub>3</sub>Si; 585.1292, Found: 585.1279.

**Synthesis of diol S9.** To a solution of **S8** (1.33 g, 2.36 mmol) in THF (15 mL) was added DBU (0.46 mL, 3.08 mmol). After being stirred at reflux temperature for 16.5 h, the mixture was cooled to -30 °C, added LiAlH<sub>4</sub> (271 mg, 7.15 mmol), and stirred for 45 min. The reacting solution was quenched by EtOAc and SiO<sub>2</sub>/H<sub>2</sub>O (10/3, 11.1 g). The solution was filtrated and concentrated. The residue was purified by medium-pressure chromatography (Isolela, eluent: *n*-hexane/EtOAc = 90:10 to *n*-hexane/EtOAc = 40:60) to give **S9** (566 mg, 55%) as a yellow oil.  $[\alpha]_D^{27}$  +38.4 (*c* 0.91,

CHCl<sub>3</sub>); <sup>1</sup>H NMR (400 MHz, CDCl<sub>3</sub>) δ<sub>H</sub>: 7.72-7.60 (m, 4H), 7.47-7.32 (m, 6H), 6.18 (dd, *J* = 5.7, 2.8 Hz, 1H), 5.96 (ddd, *J* = 5.7, 2.4, 1.4 Hz, 1H), 4.60 (m, 1H), 3.89 (dt, *J* = 9.8, 4.9 Hz, 1H), 3.76 (td, *J* = 9.8, 3.9 Hz, 1H), 3.65 (td, *J* = 6.3, 0.9 Hz, 2H), 2.53-2.39 (m, 1H), 2.19-2.18 (m, 3H), 1.73-1.06 (m, 6H), 1.05 (s, 9H); <sup>13</sup>C NMR (100 MHz, CDCl<sub>3</sub>) δ<sub>C</sub>: 140.83, 135.40, 133.92, 131.69, 129.34, 127.41, 76.19, 63.63, 62.68, 46.59, 44.42, 33.11, 32.58, 27.79, 26.69, 24.10, 19.04; IR (neat) cm<sup>-1</sup>: 3349, 2932, 1110, 823; HRMS (ESI positive) *m/z* [M+Na]<sup>+</sup> Calcd. for C<sub>27</sub>H<sub>38</sub>NaO<sub>3</sub>Si: 461.2482, Found: 461.2475.

**Synthesis of bis-TES ether S10.** To a solution of **S9** (585 mg, 1.33 mmol) in DMF (9 mL) was added TESC1 (0.74 mL, 4.42 mmol) and imidazole (390 mg, 5.72 mmol). After stirring at room temperature for 20 h under an argon atmosphere, the reaction was diluted with H<sub>2</sub>O with vigorous stirring. The water layer was extracted with EtOAc. The combined organic layers were washed with saturated aqueous NaCl, dried over Na<sub>2</sub>SO<sub>4</sub>, and filtered. The residue was purified by medium-pressure chromatography (Isolela, eluent: *n*-hexane/EtOAc = 99:1 to *n*-hexane/EtOAc = 90:10) to give **S10** (729 mg, 82%) as a colorless oil. [α]<sub>D</sub><sup>26</sup> +0.6 (*c* 1.14, CHCl<sub>3</sub>); <sup>1</sup>H NMR (400 MHz, CDCl<sub>3</sub>) δ<sub>H</sub>: 7.72-7.60 (m, 4H), 7.47-7.32 (m, 6H), 6.10 (dd, *J* = 6.0, 2.8 Hz, 1H), 5.96 (ddd, *J* = 6.0, 2.2, 1.2 Hz, 1H), 4.46 (dd, *J* = 5.8, 2.2 Hz, 1H), 3.76-3.56 (m, 4H), 2.44-2.28 (m, 1H), 2.07 (quintet, *J* = 7.0 Hz, 1H), 1.78 (dq, *J* = 13.5, 7.0 Hz, 1H), 1.69-1.07 (m, 7H), 1.04 (s, 9H), 0.96 (t, *J* = 8.0 Hz, 9H), 0.93 (t, *J* = 8.0 Hz, 9H), 0.60 (q, *J* = 8.0 Hz, 6H), 0.55 (q, *J* = 8.0 Hz, 6H); <sup>13</sup>C NMR (100 MHz, CDCl<sub>3</sub>) δ<sub>C</sub>: 140.29, 135.72, 134.34, 132.87, 129.62, 127.71, 76.29, 64.17, 62.14, 46.19, 42.92, 33.14, 32.54, 28.90, 27.01, 24.31, 19.36, 7.07, 6.97, 5.36, 4.57; IR (neat) cm<sup>-1</sup>: 3050, 2954, 1109, 823; HRMS (ESI positive) *m/z* [M+Na]<sup>+</sup> Calcd. for C<sub>39</sub>H<sub>66</sub>NaO<sub>3</sub>Si<sub>3</sub>: 689.4212, Found: 689.4191.

**Synthesis of (+)-8-(*R*)-hydroxy-phytodienoyl alcohol.** To a solution of DMSO (890 μL, 12.5 mmol) in CH<sub>2</sub>Cl<sub>2</sub> (9.5 mL) was added oxalyl chloride (520 μL, 6.06 mmol) at -78 °C under an argon atmosphere. After the reaction mixture was stirred at -78 °C for 10 min, a solution of **S10** (723 mg, 1.08 mmol) in CH<sub>2</sub>Cl<sub>2</sub> (10 mL) was slowly added. After stirring the reaction mixture at -65 °C for 1 h, Et<sub>3</sub>N (1.7 mL, 12.3 mmol) was slowly added. After the reaction mixture was stirred at -65 °C for 1 h, the mixture was gradually warmed to room temperature with stirring for 2 h. The reaction mixture was quenched with saturated aqueous NH<sub>4</sub>Cl. The mixture was extracted with *n*-

hexane. The organic layer was washed with saturated aqueous NaCl, dried over Na<sub>2</sub>SO<sub>4</sub>, and filtered. The reaction mixture was concentrated under reduced pressure to afford the mixture (706 mg) as a brown oil. The crude product was used for the next reaction without further purification.

A solution of Ph<sub>3</sub>P<sup>+</sup>CH<sub>2</sub>CH<sub>2</sub>CH<sub>3</sub> Br<sup>-</sup> (1.27 g, 3.30 mmol) in THF (28 mL) was cooled to 0 °C and stirred under an argon atmosphere. After 20 min, NaHMDS (1.9 M in THF, 2.0 mL, 3.8 mmol) was added and warmed to room temperature for 40 min. Then, the mixture was cooled to -78 °C and added DMF (2.1 mL) and the previous reaction mixture (706 mg) in THF (13 mL). The mixture was warmed to 0 °C and stirred for 4.5 h. The reaction mixture was quenched with saturated aqueous NH<sub>4</sub>Cl. The mixture was extracted with EtOAc. The organic layer was washed with saturated aqueous NaCl, dried over Na<sub>2</sub>SO<sub>4</sub>, and filtered. The reaction mixture was purified by medium-pressure chromatography (Isolela, eluent: *n*-hexane to *n*-hexane/EtOAc = 94:6) to give a mixture (552 mg) as a yellow oil. This mixture was used for the following reaction without further purification.

To a solution of a mixture (552 mg) in THF (136 mL) was added TBAF (1M in THF, 9.57 mL, 9.57 mmol) and stirred at reflux temperature for 3 h under an argon atmosphere. The solvent was removed under reduced pressure. The reaction mixture was roughly purified by medium-pressure chromatography (Isolela, eluent: 99:1 CH<sub>3</sub>Cl/MeOH to 90:10 CH<sub>3</sub>Cl/MeOH) to give (+)-8-(*R*)-hydroxy-phytodienoyl alcohol (161 mg, 66% in 3 steps) as a brown oil.  $[\alpha]_D^{25} +55.4$  (*c* 1.24, CHCl<sub>3</sub>). <sup>1</sup>H NMR (400 MHz, CDCl<sub>3</sub>) δ<sub>H</sub>: 6.24 (dd, *J* = 5.8, 2.6 Hz, 1H), 5.97 (ddd, *J* = 5.8, 2.5, 1.3 Hz, 1H), 5.50-5.37 (m, 2H), 4.52 (dd, *J* = 6.0, 2.4 Hz, 1H), 3.65 (t, *J* = 6.4 Hz, 2H), 2.55-2.44 (m, 1H), 2.40-2.27 (m, 1H), 2.25-1.93 (m, 4H), 1.73-1.41 (m, 4H), 1.40-1.20 (m, 3H), 1.20-1.05 (m, 1H), 0.99 (t, *J* = 7.6 Hz, 3H); <sup>13</sup>C NMR (100 MHz, CDCl<sub>3</sub>) δ<sub>C</sub>: 140.51, 132.59, 132.22, 127.85, 76.53, 62.91, 46.14, 45.99, 33.33, 33.04, 24.27, 23.08, 20.81, 14.28; IR (neat) cm<sup>-1</sup>: 3365, 2933, 1459, 742; HRMS (ESI positive) *m/z* [M+Na]<sup>+</sup> Calcd. for C<sub>14</sub>H<sub>24</sub>NaO<sub>2</sub> 247.1668, Found 247.1665.

### Synthesis of (+)-4,5-ddh-MeJA:

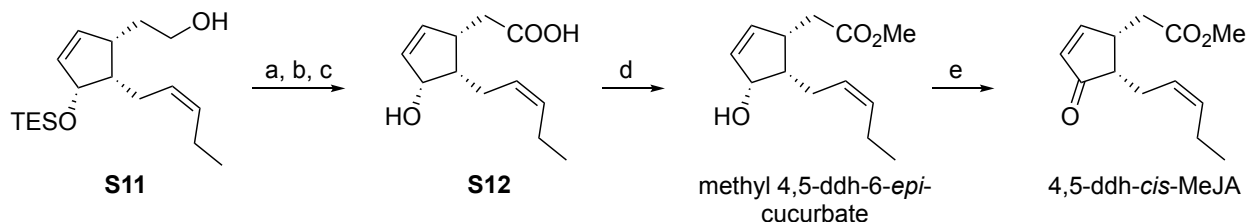

**Scheme S3. Synthesis of 4,5-ddh-MeJA.** *Reagents and conditions:* (a) Dess-Martin periodinane,  $\text{CH}_2\text{Cl}_2$ ; (b)  $\text{NaClO}_2$ ,  $\text{NaH}_2\text{PO}_4$ , 2-methyl-2-butene, *t*BuOH,  $\text{H}_2\text{O}$ ; (c) TBAF, THF, quant. (3 steps); (d)  $\text{TMSCHN}_2$ , MeOH, benzene, 62%; (e) Jones reagent, acetone,  $-20\text{ }^\circ\text{C}$ , 55%.

**Synthesis of carboxylic acid S12.** To a solution of **S11**<sup>1,2</sup> (30.0 mg, 96.6  $\mu\text{mol}$ ) in  $\text{CH}_2\text{Cl}_2$  (3 mL) was added Dess-Martin periodinane (63.2 mg, 149  $\mu\text{mol}$ ). After being stirred for 80 min, the reaction mixture was quenched with saturated aqueous  $\text{NaHCO}_3$  and extracted with *n*-hexane. The organic layer was washed with saturated aqueous NaCl, dried over  $\text{Na}_2\text{SO}_4$ , and filtered. The reaction mixture was concentrated under reduced pressure to afford the aldehyde (37.2 mg, mixture) as a colorless oil. The crude product was used for the following reaction without further purification.

To a solution of the above aldehyde and 2-methyl-2-butene (1.8 ml) in *t*BuOH (5.3 ml) were added  $\text{H}_2\text{O}$  (1.3 ml),  $\text{NaH}_2\text{PO}_4 \cdot 2\text{H}_2\text{O}$  (469 mg, 3.00 mmol) and  $\text{NaClO}_2$  (114 mg, 1.26 mmol) and the mixture was stirred at room temperature for 70 min. The reaction was quenched with saturated aqueous  $\text{NH}_4\text{Cl}$ . The water layer was extracted with EtOAc, and the combined organic layers were dried over  $\text{Na}_2\text{SO}_4$  and concentrated under reduced pressure to afford the carboxylic acid (65.2 mg, mixture) as a colorless oil. The crude product was used for the following reaction without further purification.

To a solution of the above carboxylic acid in THF (6.7 mL) was added 1 M TBAF in THF (330  $\mu\text{L}$ , 330  $\mu\text{mol}$ ). After stirring at room temperature for 1 h, the solvent was removed under reduced pressure. The residue was purified by medium-pressure chromatography (Isolera, eluent:  $\text{AcOH}/n\text{-hexane}/\text{EtOAc} = 0.1:88:12$  to  $\text{AcOH}/\text{EtOAc} = 0.1:99.9$ ) to give **S8** (21.8 mg, quant. in 3 steps) as a colorless oil.  $[\alpha]_{\text{D}}^{23} +44.4$  (*c* 0.70,  $\text{CHCl}_3$ ).  $^1\text{H}$  NMR (400 MHz,  $\text{CDCl}_3$ )  $\delta_{\text{H}}$ : 6.15 (dd, *J* = 5.8, 2.7 Hz, 1H), 6.01 (dd, *J* = 5.8, 2.5 Hz, 1H), 5.50-5.38 (m, 2H), 4.55 (dd, *J* = 5.6, 2.7 Hz,



1H), 3.02-2.91 (m, 1H), 2.63 (dd,  $J = 16.1, 5.4$  Hz, 1H), 2.39-2.06 (m, 6H), 0.99 (t,  $J = 7.6$  Hz, 3H);  $^{13}\text{C}$  NMR (100 MHz,  $\text{CDCl}_3$ )  $\delta_{\text{C}}$ : 178.36, 139.32, 133.26, 133.08, 127.04, 76.29, 45.07, 42.32, 36.37, 23.15, 20.78, 14.15; IR (film)  $\text{cm}^{-1}$ : 3377, 3058, 2963, 2931, 1715, 1702; HRMS (ESI, negative)  $m/z$   $[\text{M}-\text{H}]^-$  Calcd. for  $\text{C}_{12}\text{H}_{17}\text{O}_3$ : 209.1183, Found: 209.1186.

**Synthesis of (+)-methyl 4,5-ddh-6-*epi*-cucurbate.** To a solution of **S8** (15.0 mg, 71.4  $\mu\text{mol}$ ) in MeOH (1 mL) and benzene (1 mL) was added TMS diazomethane solution (0.6 M in *n*-hexane, 600  $\mu\text{L}$ , 0.36 mmol) at 0  $^{\circ}\text{C}$  for 10 min, the solvent was removed under reduced pressure. The residue was purified by medium-pressure chromatography (Isolera, eluent: *n*-hexane/EtOAc = 98:2 to *n*-hexane/EtOAc = 80:20) to give 4,5-ddh-6-*epi*-cucurbate (10.0 mg, 62%) as a colorless oil.  $[\alpha]_{\text{D}}^{25} +38.4$  ( $c$  0.50,  $\text{CHCl}_3$ ).  $^1\text{H}$  NMR (400 MHz,  $\text{CDCl}_3$ )  $\delta_{\text{H}}$ : 6.09 (dd,  $J = 5.9, 2.8$  Hz, 1H), 6.00 (dd,  $J = 5.9, 2.6$  Hz, 1H), 5.50-5.38 (m, 2H), 4.53 (brdd,  $J = 5.3, 2.4$  Hz, 1H), 3.03-2.90 (m, 1H), 2.58 (dd,  $J = 16.0, 5.6$  Hz, 1H), 2.39-2.03 (m, 6H), 0.98 (t,  $J = 7.4$  Hz, 3H);  $^{13}\text{C}$  NMR (100 MHz,  $\text{CDCl}_3$ )  $\delta_{\text{C}}$ : 173.87, 138.92, 133.43, 132.88, 127.24, 76.30, 51.62, 45.08, 42.62, 36.27, 23.22, 20.80, 14.18; IR (film)  $\text{cm}^{-1}$ : 3440, 2920, 1733, 1718, 1438, 1168; HRMS (ESI, positive)  $m/z$   $[\text{M}-\text{H}]^+$  Calcd. for  $\text{C}_{13}\text{H}_{20}\text{NaO}_3$ : 247.1310, Found: 247.1305.

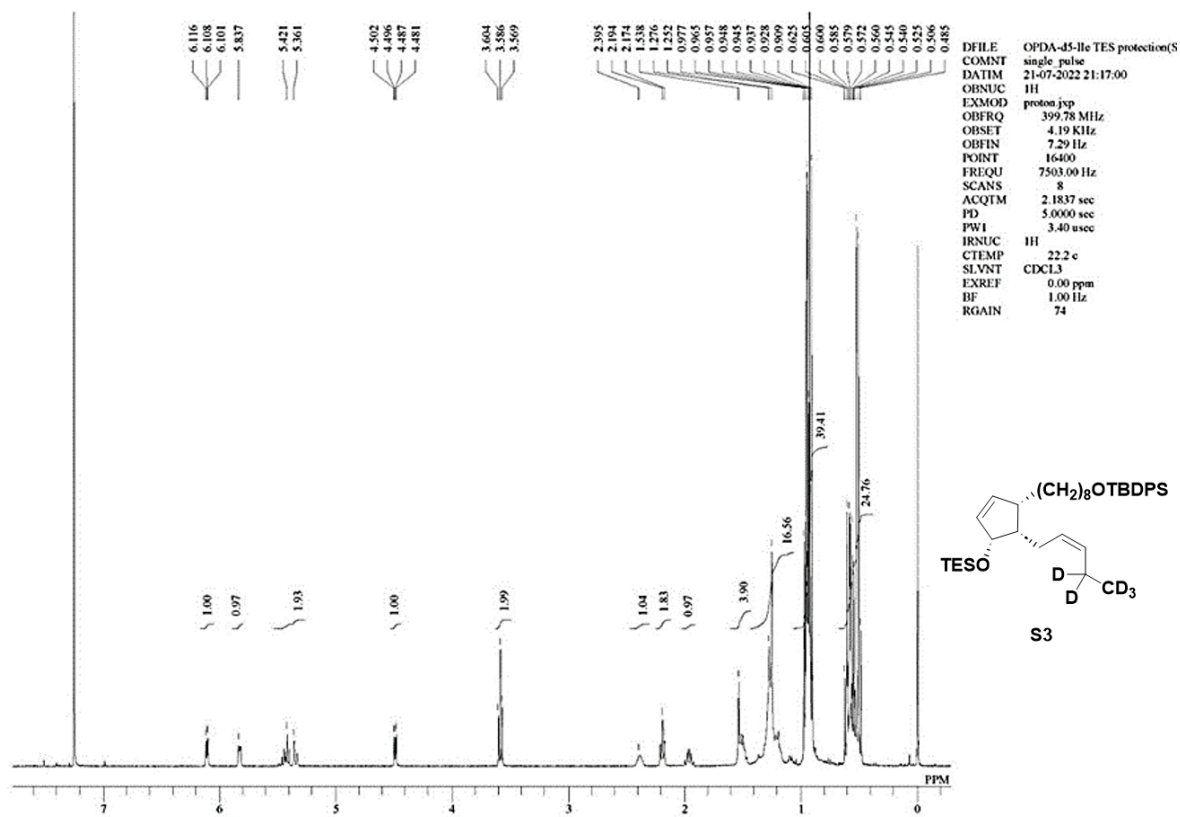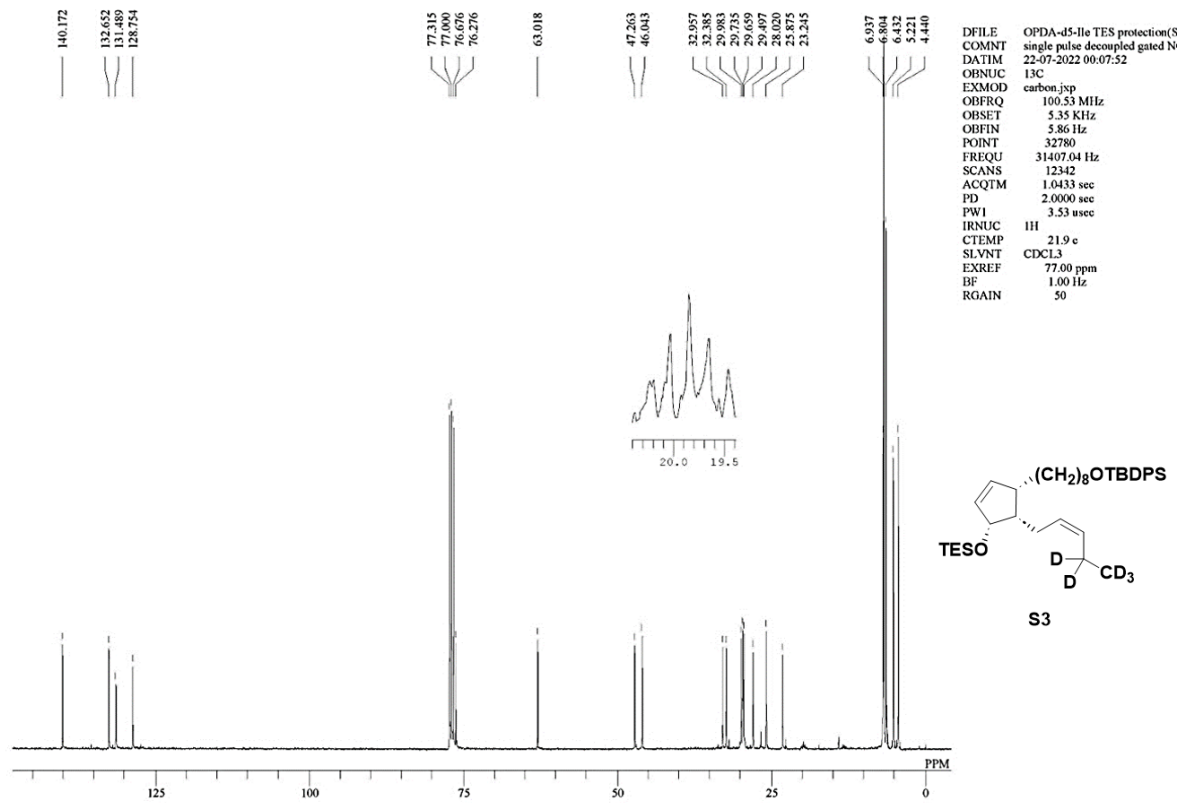

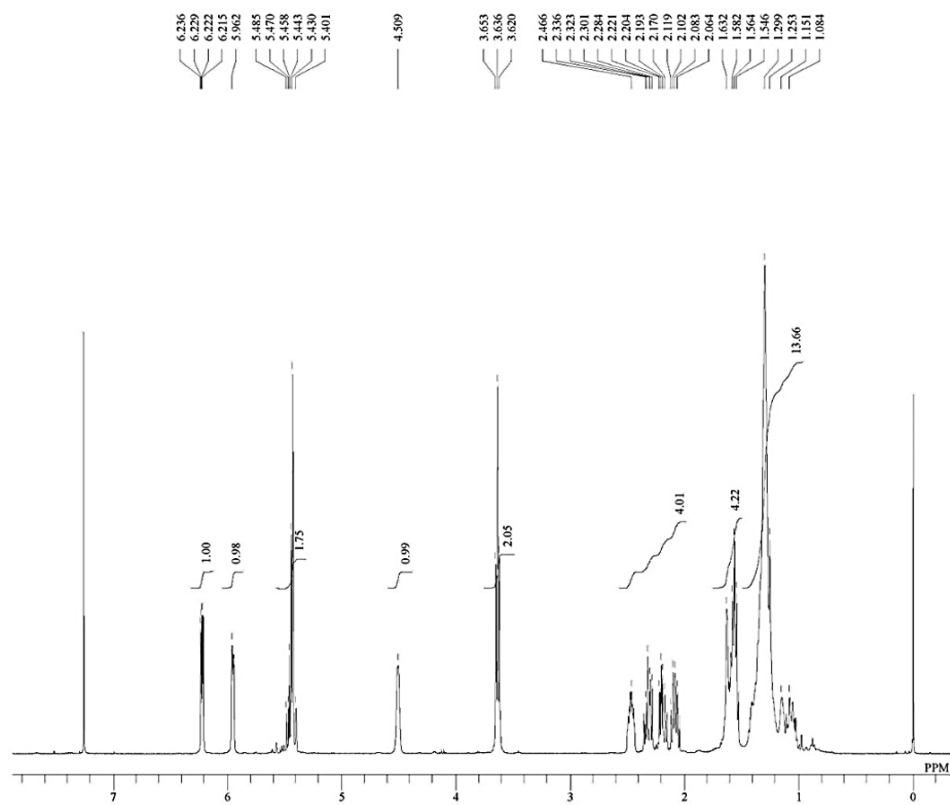

DFILE Deprotection proton.jdf  
 COMNT single pulse  
 DATIM 24-09-2021 11:26:08  
 OBNUC <sup>1</sup>H  
 EXMOD proton.jsp  
 OBFREQ 399.78 MHz  
 OBSET 4.19 KHz  
 OBFIN 7.29 Hz  
 POINT 16400  
 FREQU 7503.00 Hz  
 SCANS 8  
 ACQTM 2.1837 sec  
 PD 5.0000 sec  
 PW1 2.95 usec  
 IRNUC <sup>1</sup>H  
 CTMP 22.0 c  
 SLVNT CDCL<sub>3</sub>  
 EXREF 0.00 ppm  
 BF 1.00 Hz  
 RGAIN 54

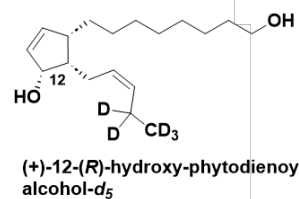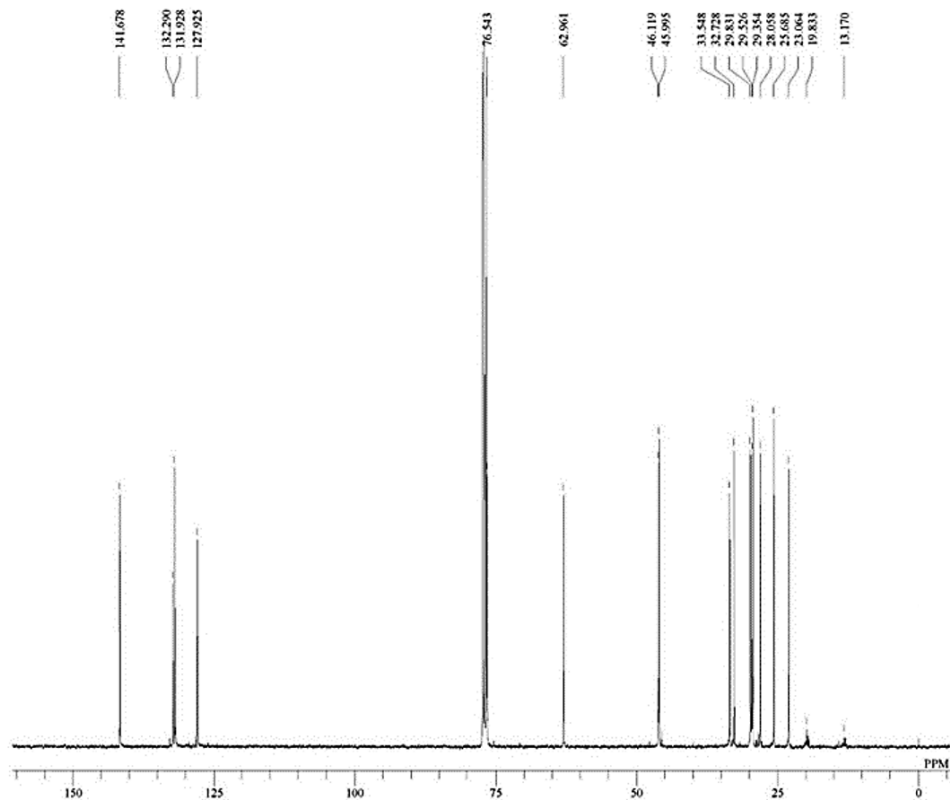

DFILE Deprotection carbon.jdf  
 COMNT single pulse decoupled gated N  
 DATIM 24-09-2021 13:40:14  
 OBNUC <sup>13</sup>C  
 EXMOD carbon.jsp  
 OBFREQ 100.53 MHz  
 OBSET 5.35 KHz  
 OBFIN 5.86 Hz  
 POINT 32780  
 FREQU 31407.04 Hz  
 SCANS 3902  
 ACQTM 0.0000 sec  
 PD 2.0000 sec  
 PW1 3.37 usec  
 IRNUC <sup>13</sup>C  
 CTMP 21.7 c  
 SLVNT CDCL<sub>3</sub>  
 EXREF 77.00 ppm  
 BF 1.00 Hz  
 RGAIN 50

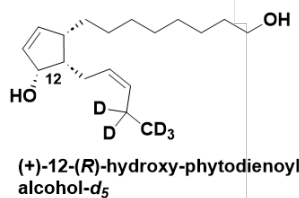

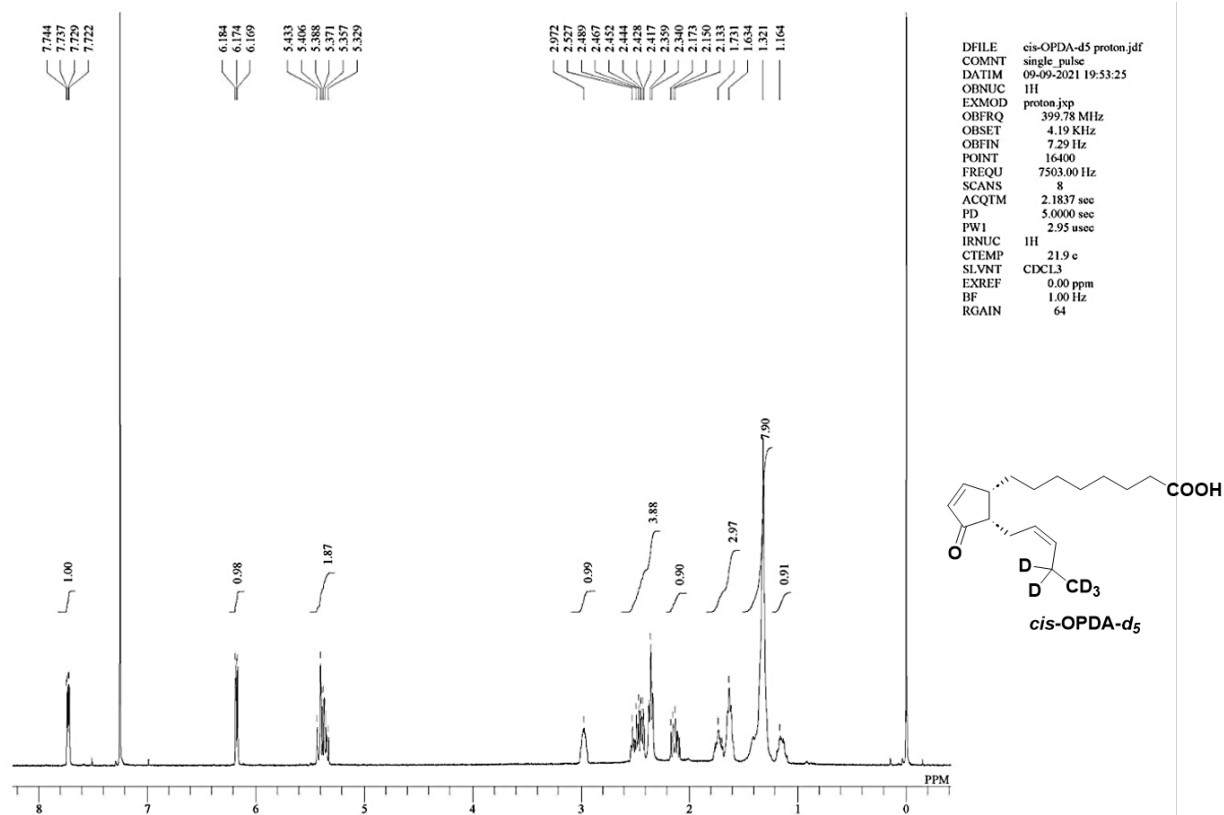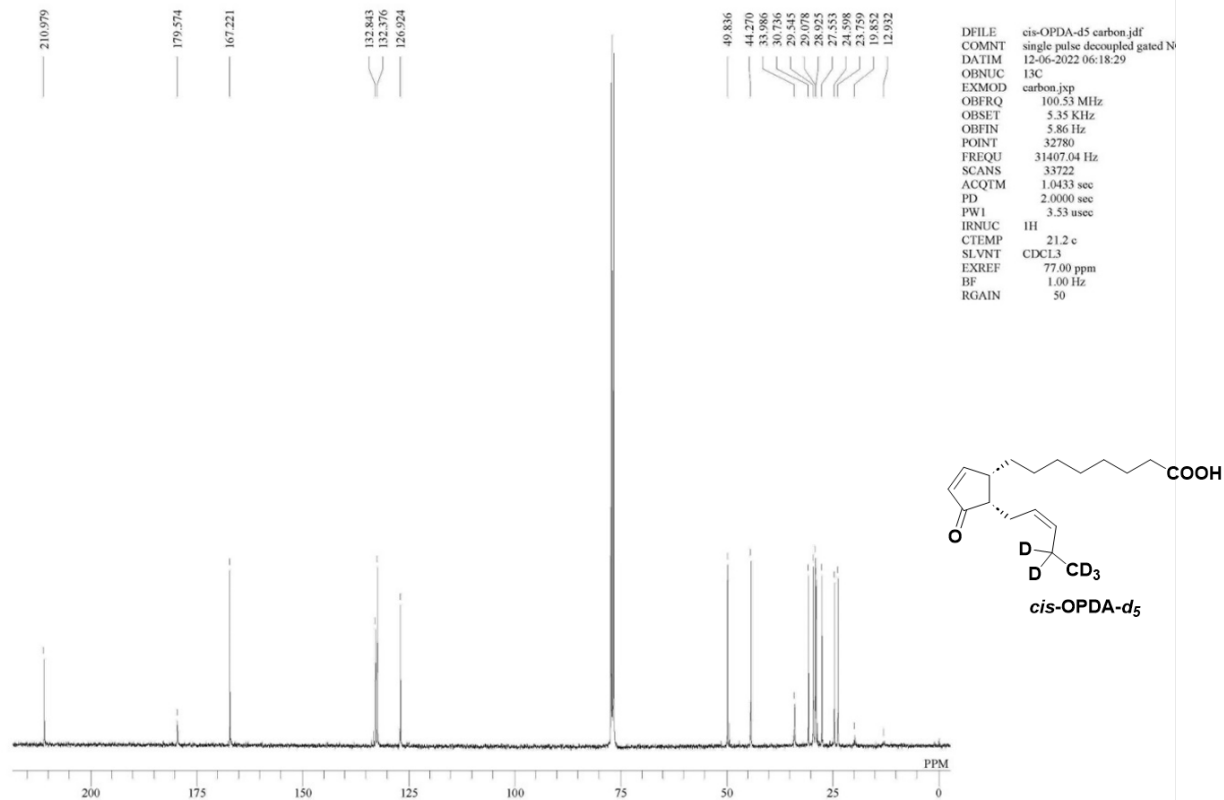

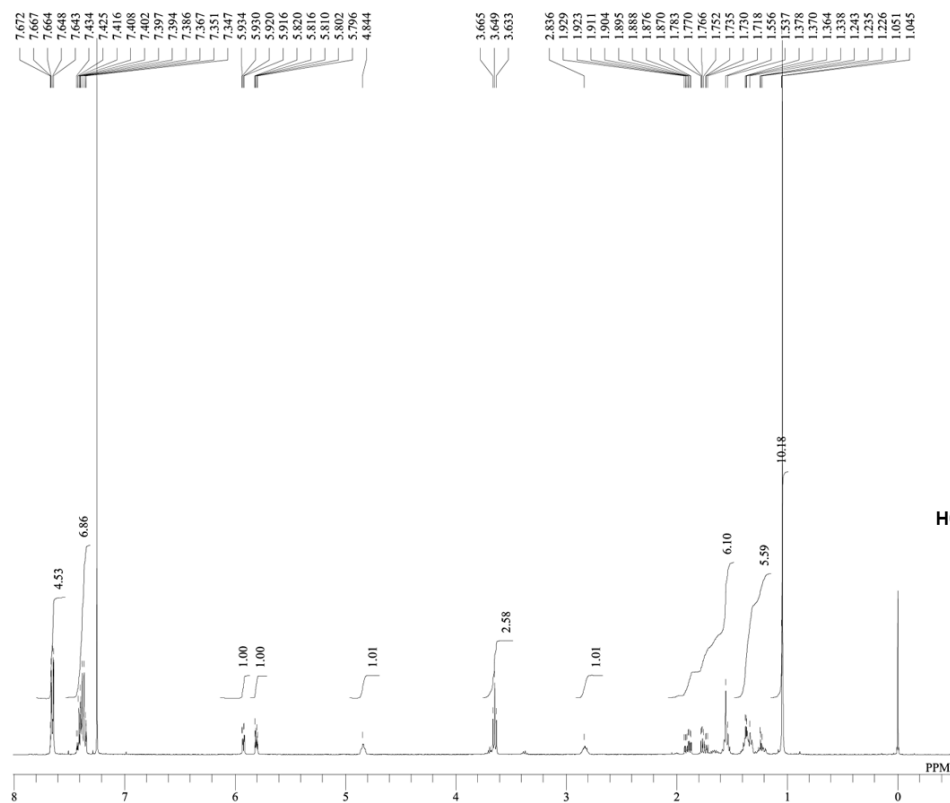

DFILE S10proton.als  
COMNT single\_pulse  
DATIM 29-08-2022 14:11:40  
OBNUC 1H  
EXMOD proton.jsp  
OBFREQ 399.78 MHz  
OBSET 4.19 KHz  
OBFIN 7.29 Hz  
POINT 13120  
FREQU 6002.40 Hz  
SCANS 8  
ACQTM 2.1837 sec  
PD 5.0000 sec  
PW1 3.40 usec  
IRNUC 1H  
CTEMP 21.3 c  
SLVNT CDCL3  
EXREF 0.00 ppm  
BF 1.00 Hz  
RGAIN 62

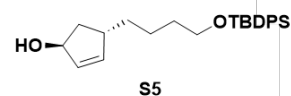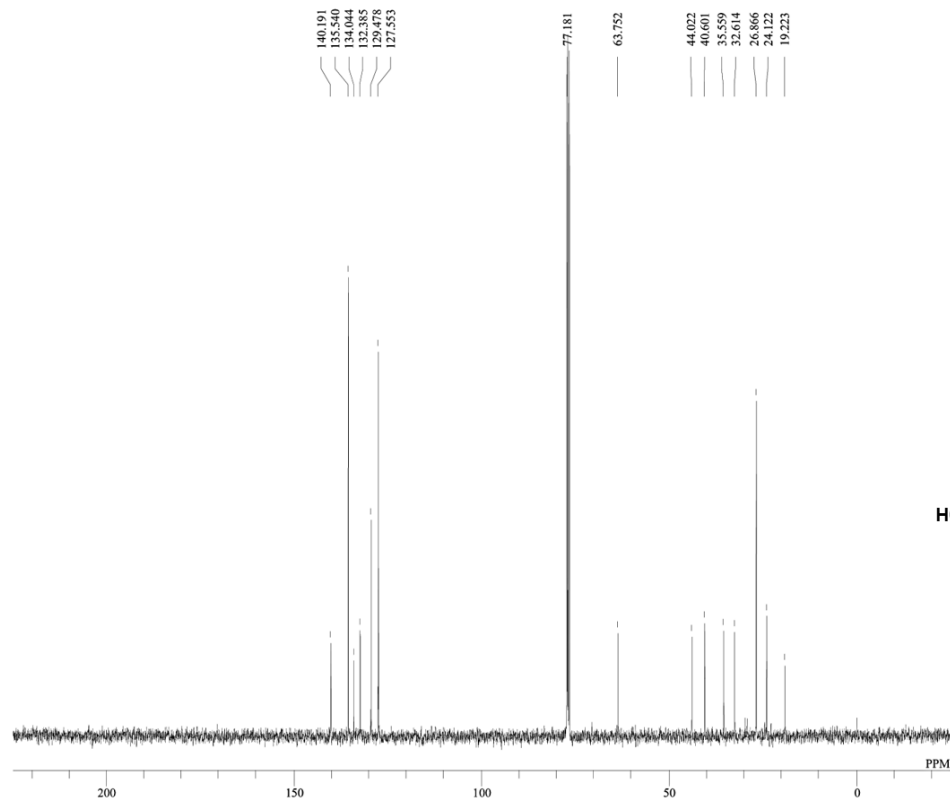

DFILE S10carbon.als  
COMNT single\_pulse decoupled gated N  
DATIM 29-08-2022 15:44:04  
OBNUC 13C  
EXMOD carbon.jsp  
OBFREQ 100.53 MHz  
OBSET 5.35 KHz  
OBFIN 5.86 Hz  
POINT 26224  
FREQU 25125.63 Hz  
SCANS 304  
ACQTM 1.0433 sec  
PD 2.0000 sec  
PW1 3.53 usec  
IRNUC 1H  
CTEMP 21.3 c  
SLVNT CDCL3  
EXREF 77.00 ppm  
BF 1.00 Hz  
RGAIN 50

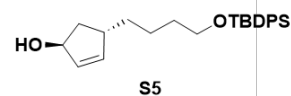

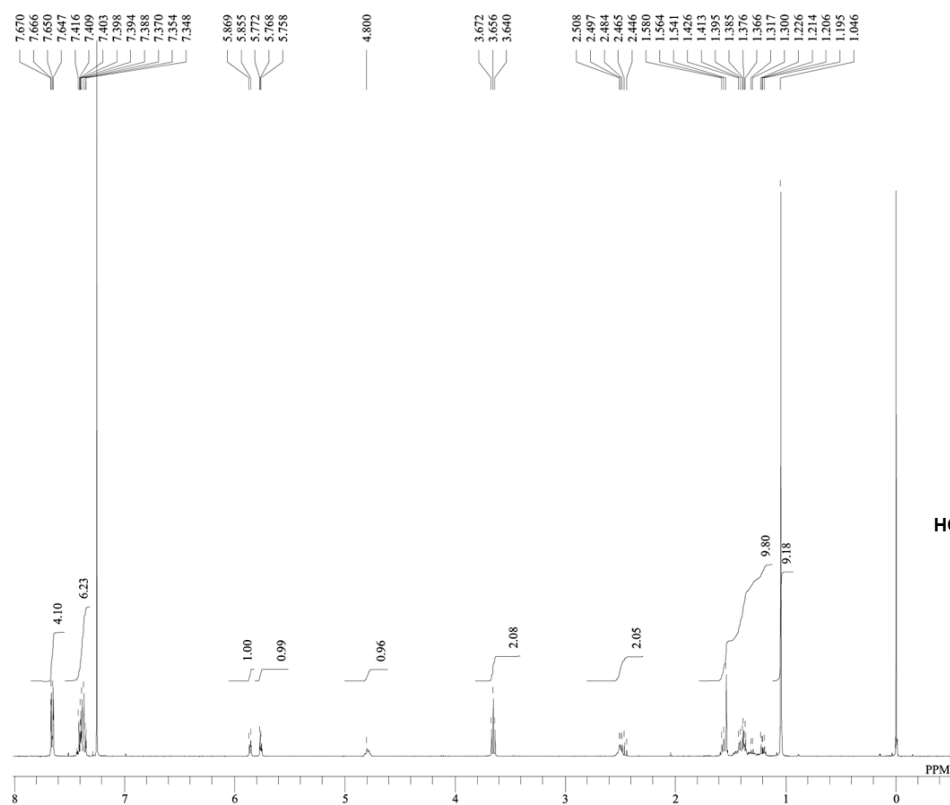

DFILE S11proton.als  
COMNT single\_pulse  
DATIM 14-09-2022 15:47:18  
OBNUC <sup>1</sup>H  
EXMOD proton.jxp  
OBFRQ 399.78 MHz  
OBSET 4.19 KHz  
OBFIN 7.29 Hz  
POINT 13120  
FREQU 6002.40 Hz  
SCANS 8  
ACQTM 2.1837 sec  
PD 5.0000 sec  
PW1 3.40 usec  
IRNUC <sup>1</sup>H  
CTEMP 21.5 c  
SLVNT CDCL3  
EXREF 0.00 ppm  
BF 1.00 Hz  
RGAIN 76

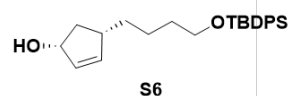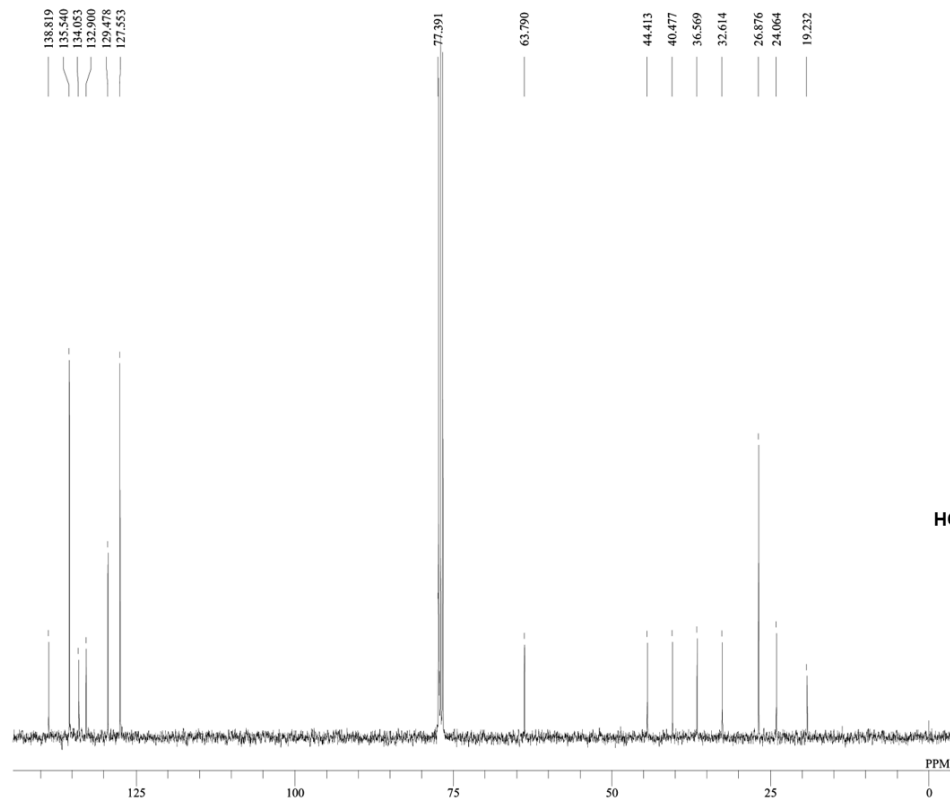

DFILE S11carbon.als  
COMNT single\_pulse decoupled gated N  
DATIM 14-09-2022 16:28:39  
OBNUC <sup>13</sup>C  
EXMOD carbon.jxp  
OBFRQ 100.53 MHz  
OBSET 5.35 KHz  
OBFIN 5.86 Hz  
POINT 26224  
FREQU 25125.63 Hz  
SCANS 300  
ACQTM 1.0433 sec  
PD 2.0000 sec  
PW1 3.53 usec  
IRNUC <sup>1</sup>H  
CTEMP 21.5 c  
SLVNT CDCL3  
EXREF 77.00 ppm  
BF 1.00 Hz  
RGAIN 50

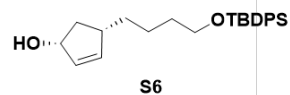

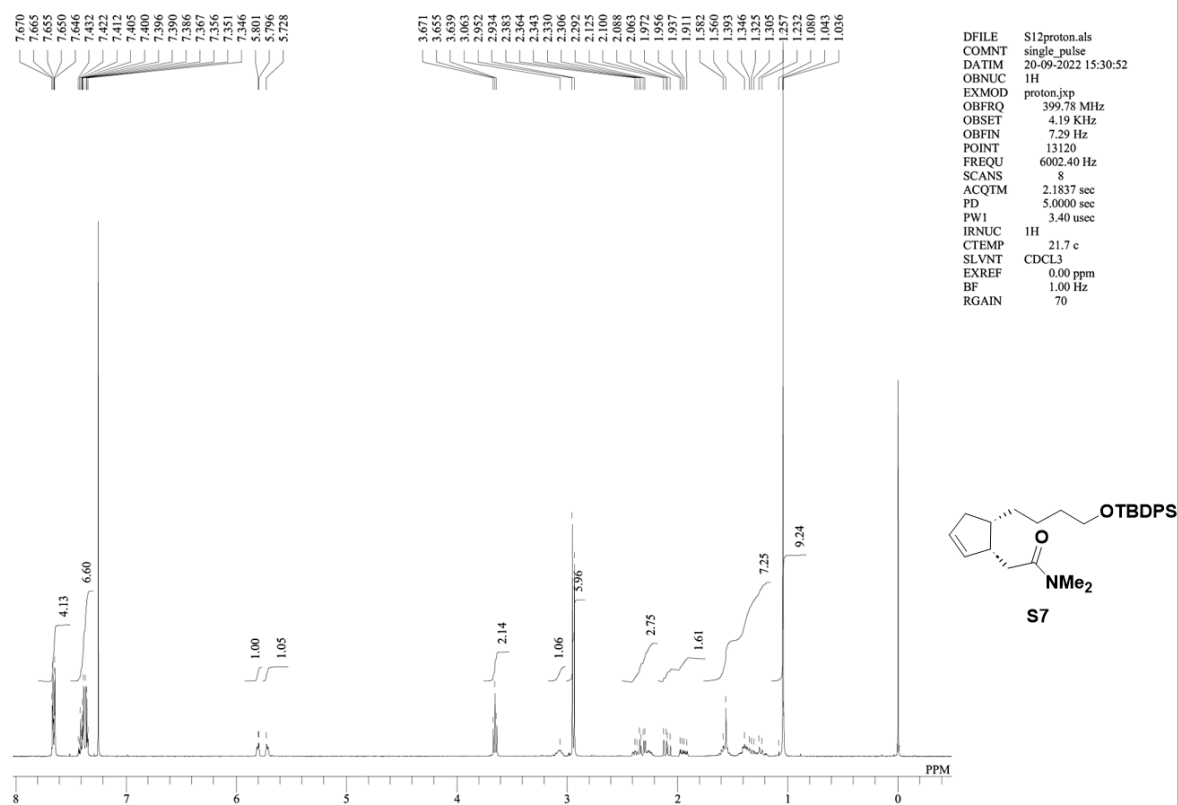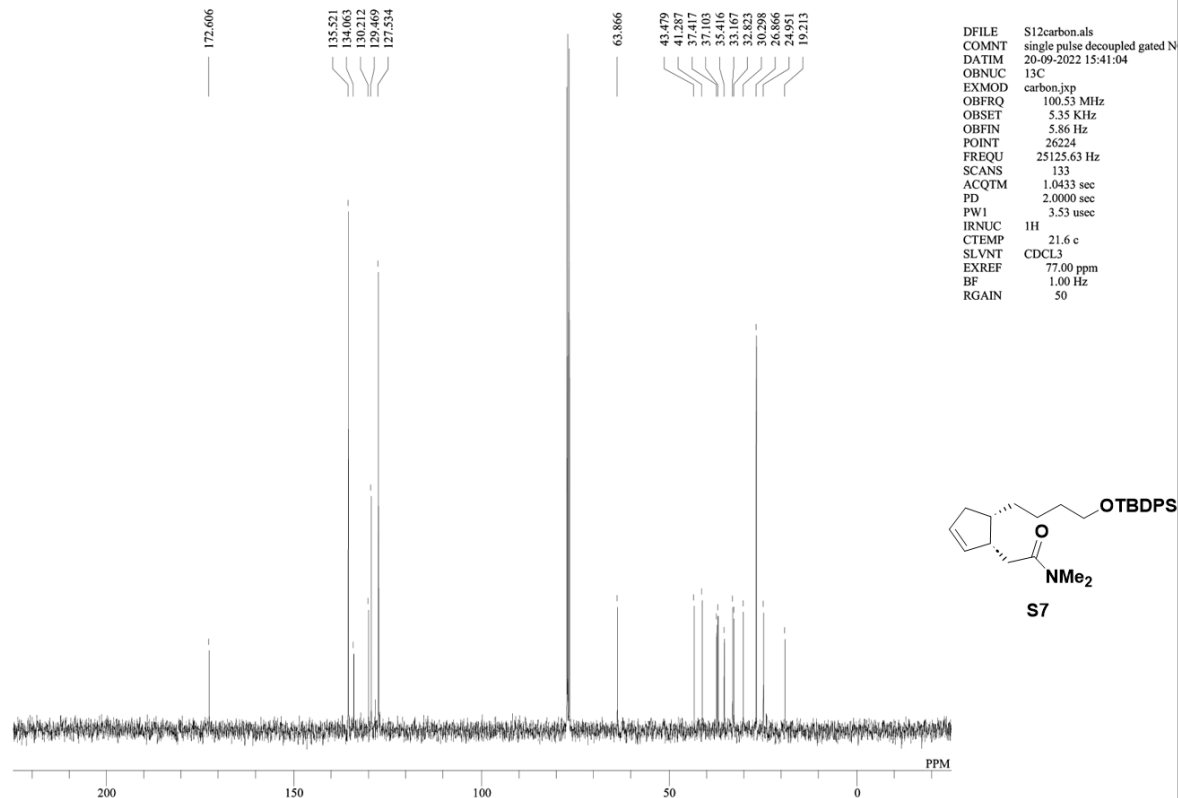

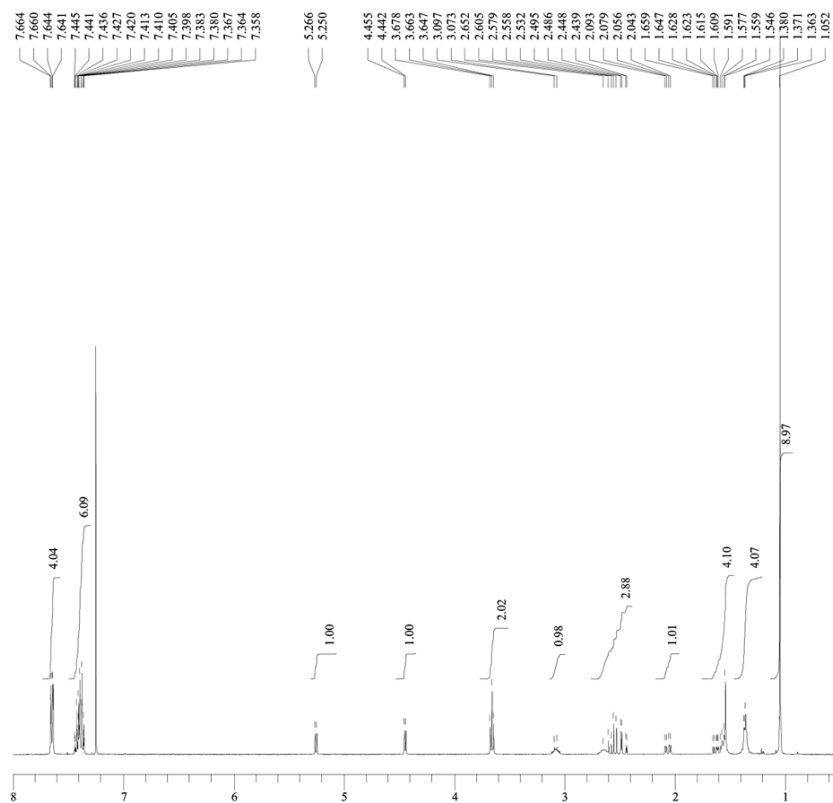

DFILE S13proton.als  
 COMNT single\_pulse  
 DATIM 22-09-2022 15:16:55  
 OBNUC 1H  
 EXMOD proton.jxp  
 OBFREQ 399.78 MHz  
 OBSET 4.19 KHz  
 OBFIN 7.29 Hz  
 POINT 13120  
 FREQU 6002.40 Hz  
 SCANS 8  
 ACQTM 2.1837 sec  
 PD 5.0000 sec  
 PW1 3.40 usec  
 IRNUC 1H  
 CTEMP 21.3 c  
 SLVNT CDCL3  
 EXREF 0.00 ppm  
 BF 1.00 Hz  
 RGAIN 70

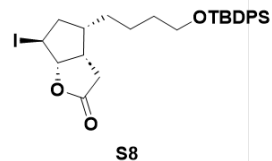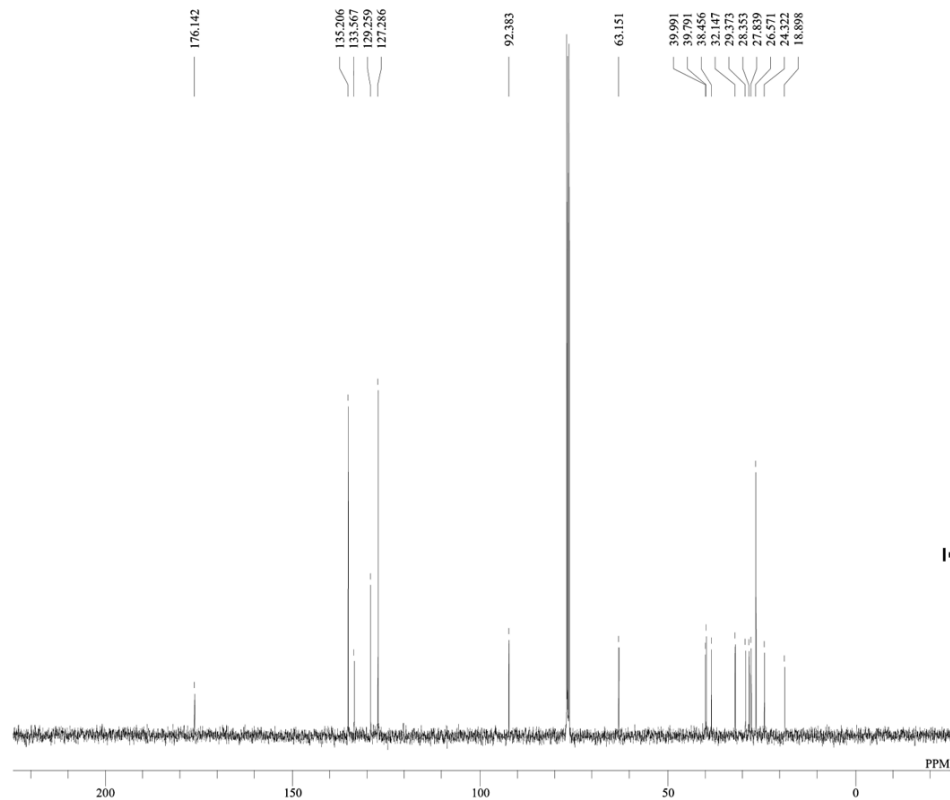

DFILE S13carbon.als  
 COMNT single pulse decoupled gated N  
 DATIM 22-09-2022 14:53:28  
 OBNUC 13C  
 EXMOD carbon.jxp  
 OBFREQ 100.53 MHz  
 OBSET 5.35 KHz  
 OBFIN 5.86 Hz  
 POINT 26224  
 FREQU 25125.63 Hz  
 SCANS 265  
 ACQTM 1.0433 sec  
 PD 2.0000 sec  
 PW1 3.53 usec  
 IRNUC 1H  
 CTEMP 21.4 c  
 SLVNT CDCL3  
 EXREF 77.00 ppm  
 BF 1.00 Hz  
 RGAIN 50

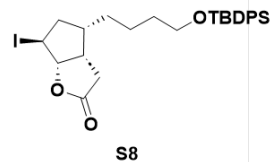



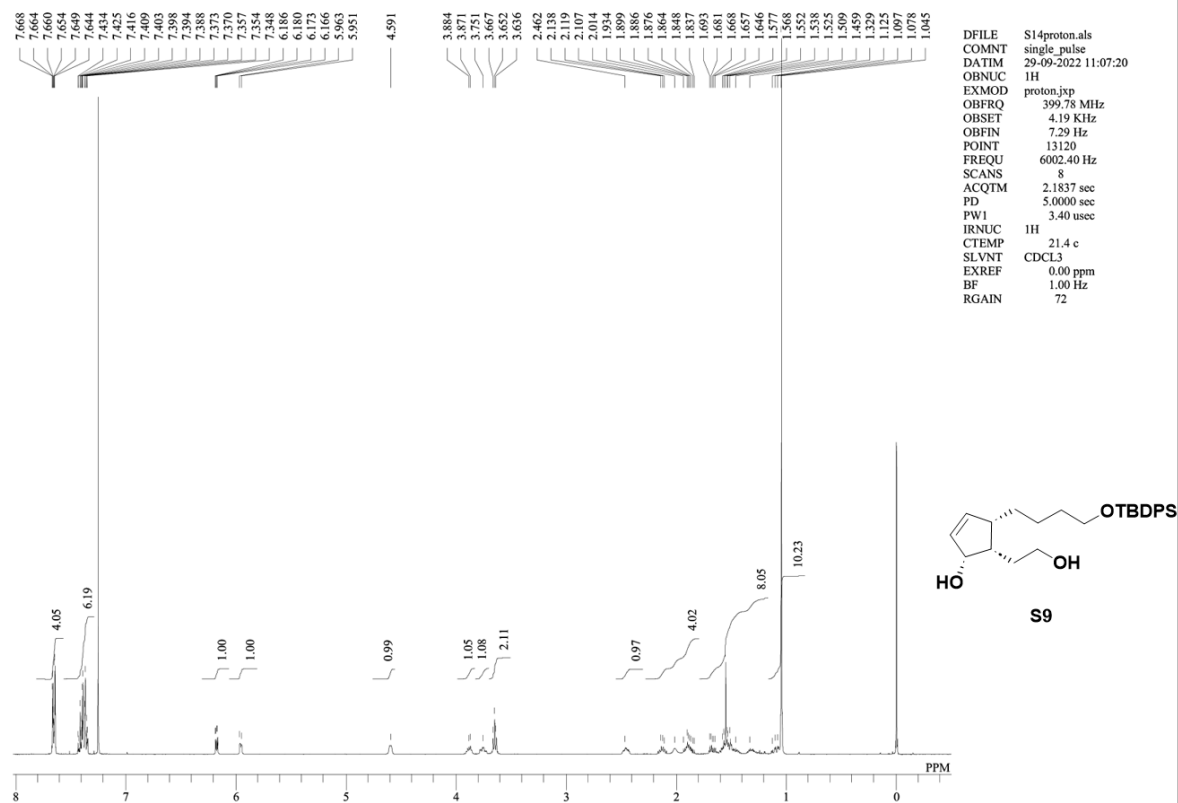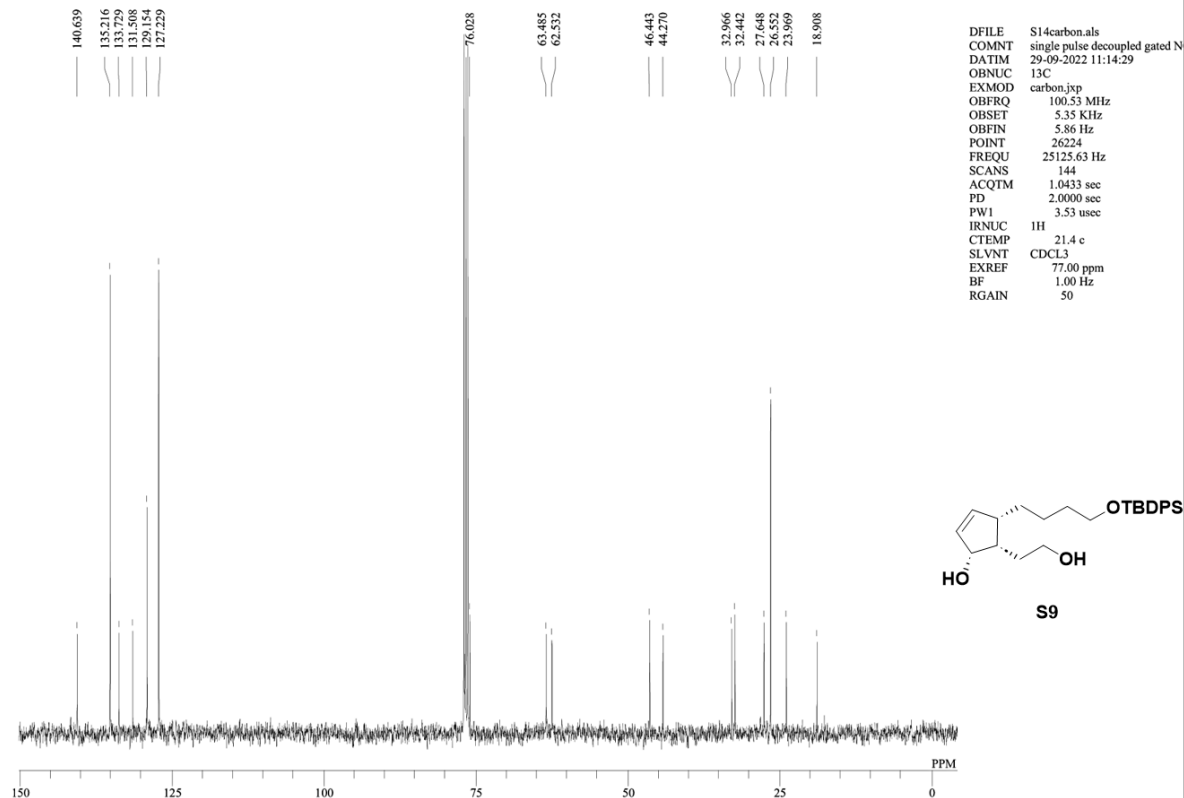

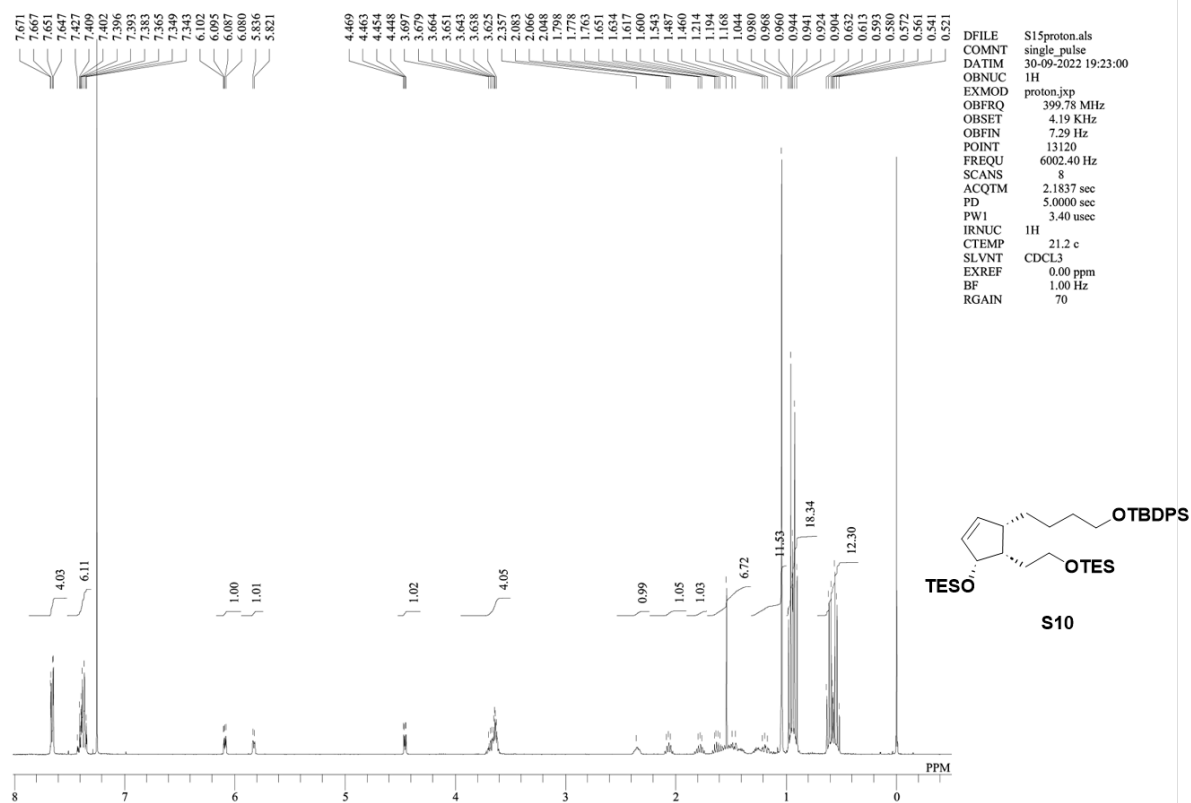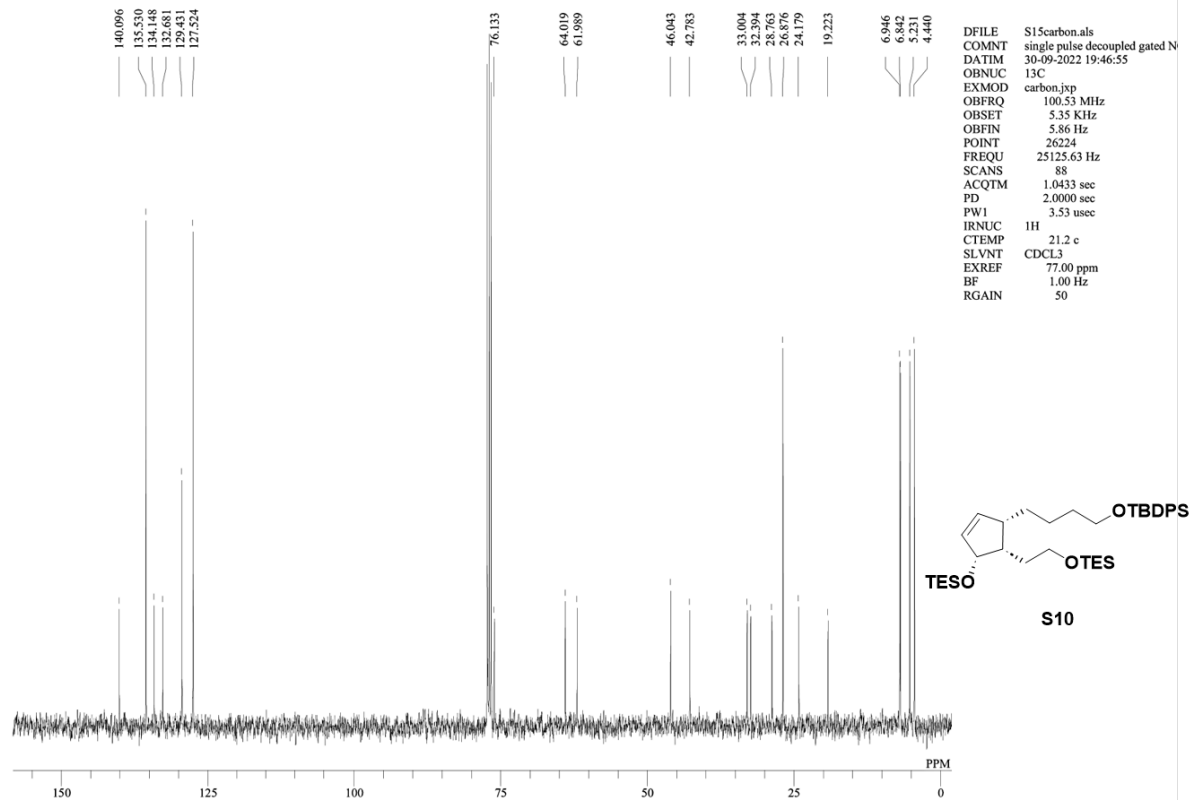

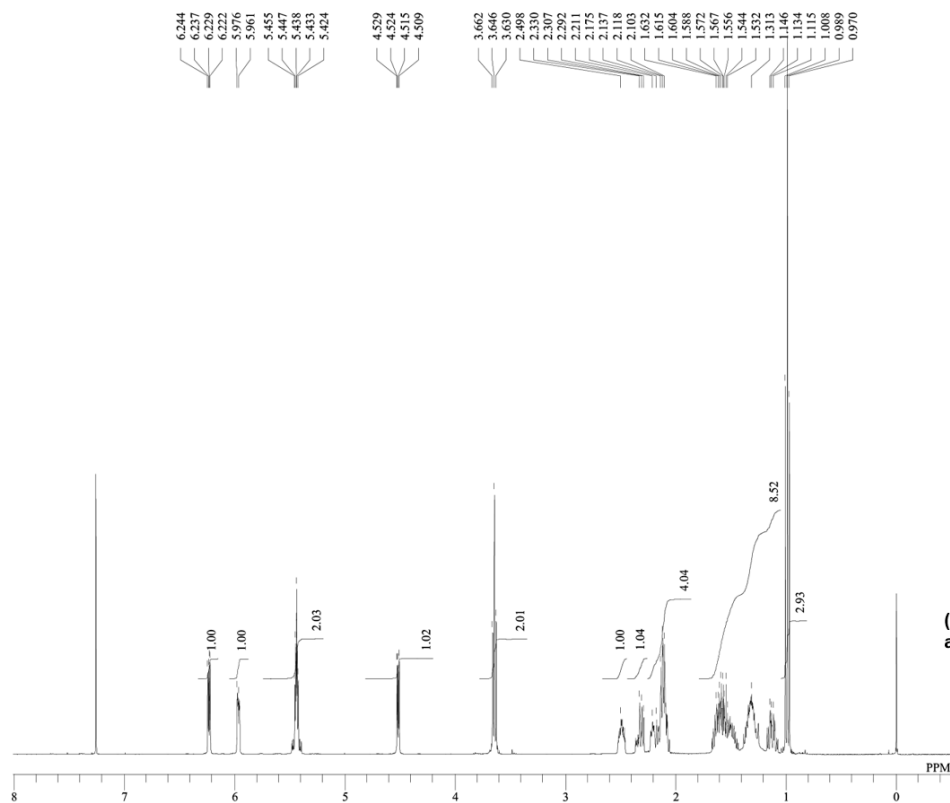

DFILE (+)-8-(R)-hydroxy-phytodienoyl  
COMNT single\_pulse  
DATIM 08-11-2022 20:34:44  
OBNUC 1H  
EXMOD proton.jpg  
OBFRQ 399.78 MHz  
OBSET 4.19 KHz  
OBFIN 7.29 Hz  
POINT 13120  
FREQU 6002.40 Hz  
SCANS 8  
ACQTM 2.1837 sec  
PD 5.0000 sec  
PW1 3.40 usec  
IRNUC 1H  
CTEMP 20.9 c  
SLVNT CDCL3  
EXREF 0.00 ppm  
BF 1.00 Hz  
RGAIN 64

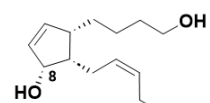

**(+)-8-(R)-hydroxy-phytodienoyl alcohol**

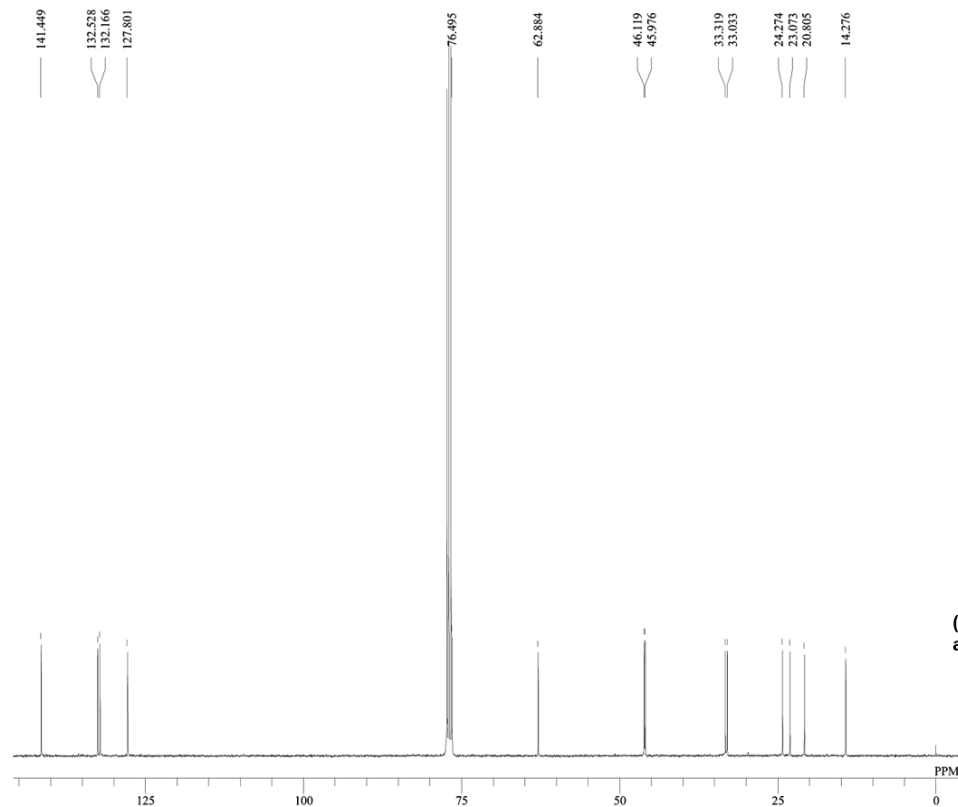

DFILE (+)-8-(R)-hydroxy-phytodienoyl  
COMNT single\_pulse decoupled gated N  
DATIM 09-11-2022 00:30:58  
OBNUC 13C  
EXMOD carbon.jpg  
OBFRQ 100.53 MHz  
OBSET 5.35 KHz  
OBFIN 5.86 Hz  
POINT 26224  
FREQU 25125.63 Hz  
SCANS 10402  
ACQTM 1.0433 sec  
PD 2.0000 sec  
PW1 3.53 usec  
IRNUC 1H  
CTEMP 20.9 c  
SLVNT CDCL3  
EXREF 77.00 ppm  
BF 1.00 Hz  
RGAIN 50

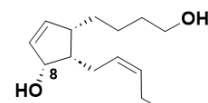

**(+)-8-(R)-hydroxy-phytodienoyl alcohol**

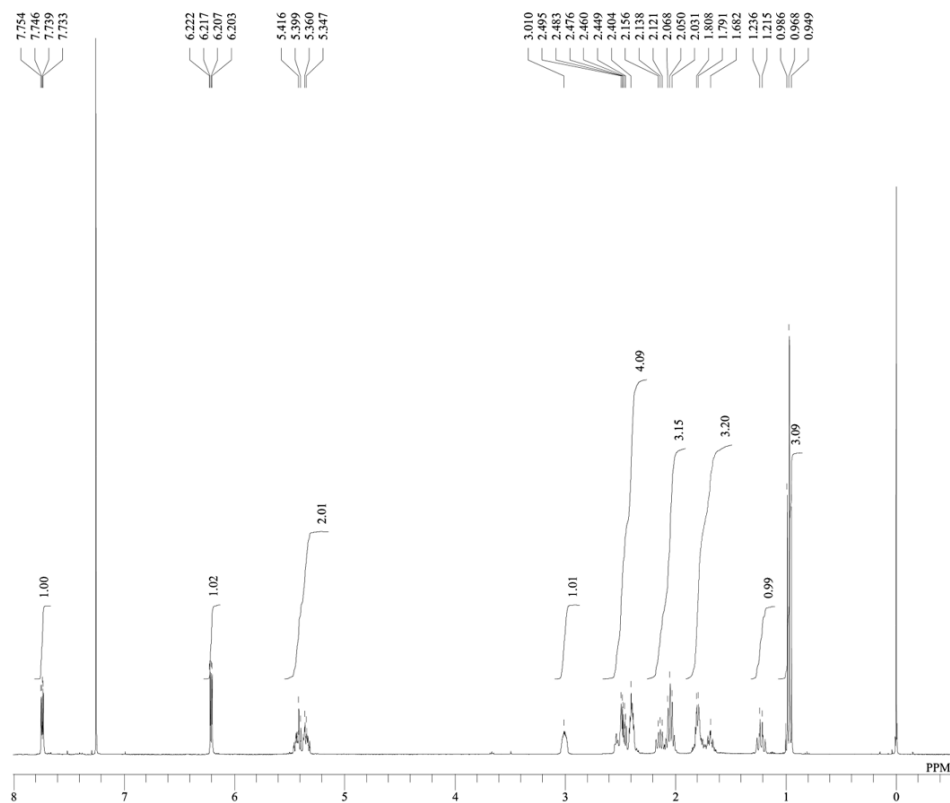

DFILE tn-cis-OPDA\_proton.als  
 COMNT single\_pulse  
 DATIM 27-10-2022 14:04:28  
 OBNUC <sup>1</sup>H  
 EXMOD proton.jxp  
 OBFREQ 399.78 MHz  
 OBSET 4.19 KHz  
 OBFIN 7.29 Hz  
 POINT 13120  
 FREQU 6002.40 Hz  
 SCANS 52  
 ACQTM 2.1837 sec  
 PD 5.0000 sec  
 PW1 3.40 usec  
 IRNUC <sup>1</sup>H  
 CTEMP 20.8 c  
 SLVNT CDCL3  
 EXREF 0.00 ppm  
 BF 1.00 Hz  
 RGAIN 72

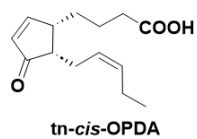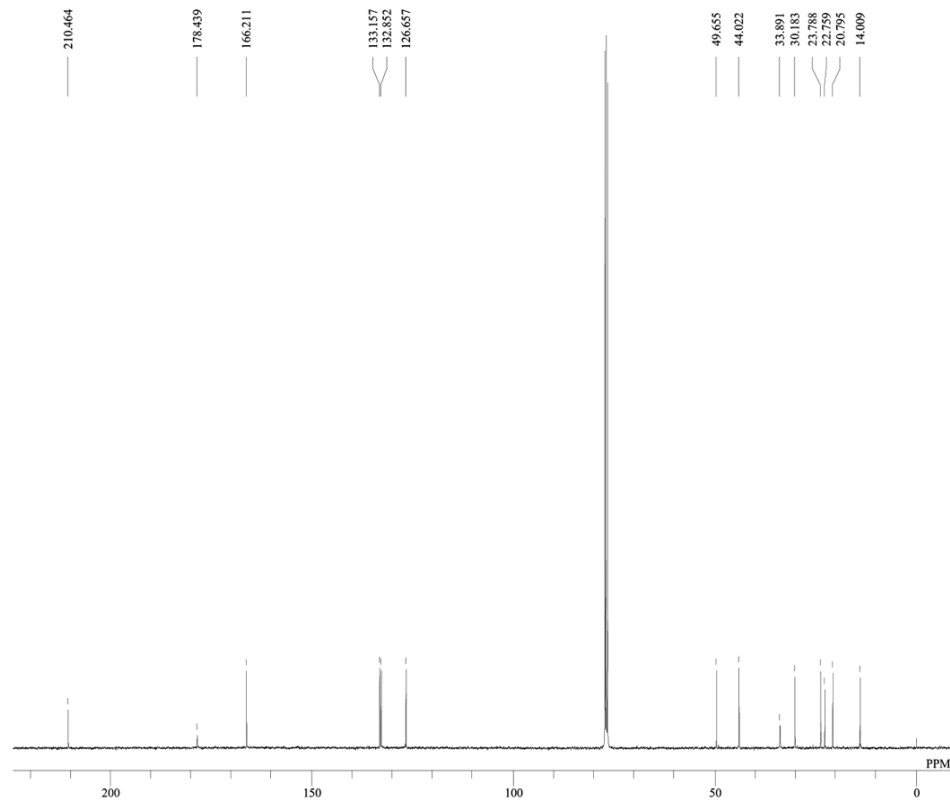

DFILE tn-cis-OPDA\_carbon.als  
 COMNT single pulse decoupled gated N  
 DATIM 28-10-2022 23:46:23  
 OBNUC <sup>13</sup>C  
 EXMOD carbon.jxp  
 OBFREQ 100.53 MHz  
 OBSET 5.35 KHz  
 OBFIN 5.86 Hz  
 POINT 26224  
 FREQU 25125.63 Hz  
 SCANS 11164  
 ACQTM 1.0433 sec  
 PD 2.0000 sec  
 PW1 3.53 usec  
 IRNUC <sup>13</sup>C  
 CTEMP 20.6 c  
 SLVNT CDCL3  
 EXREF 77.00 ppm  
 BF 1.00 Hz  
 RGAIN 50

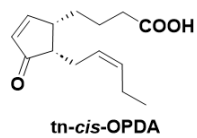

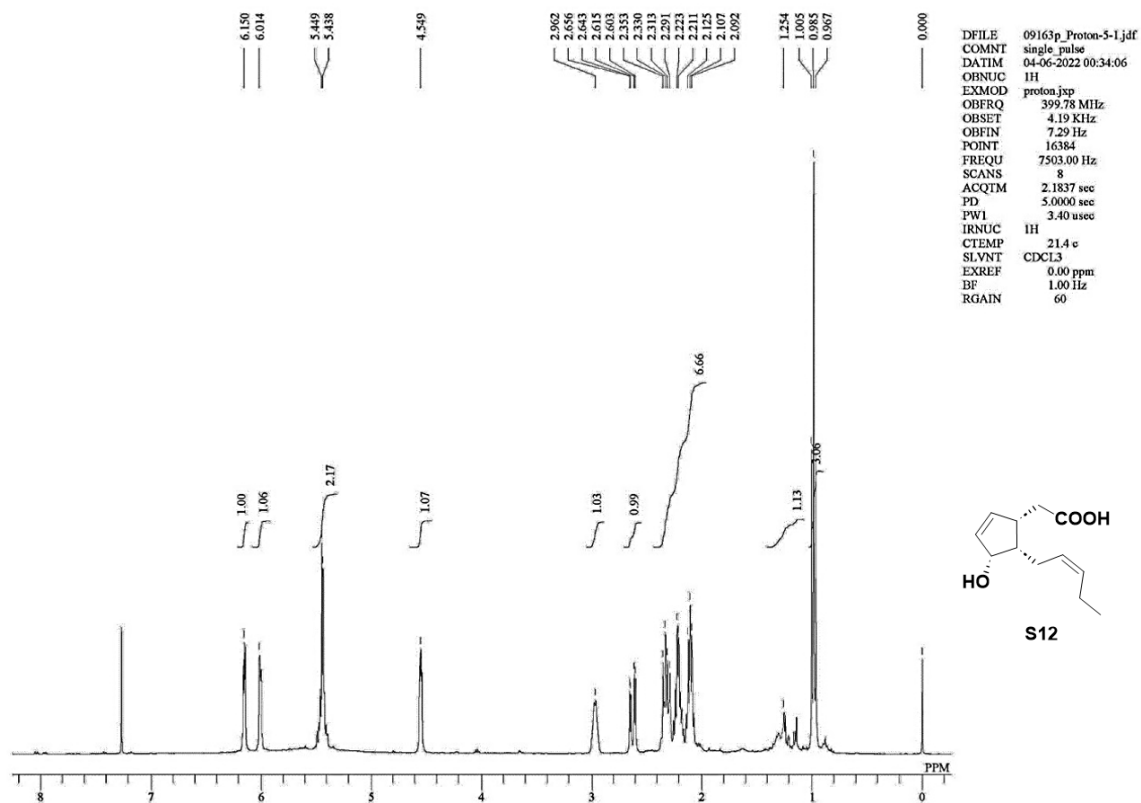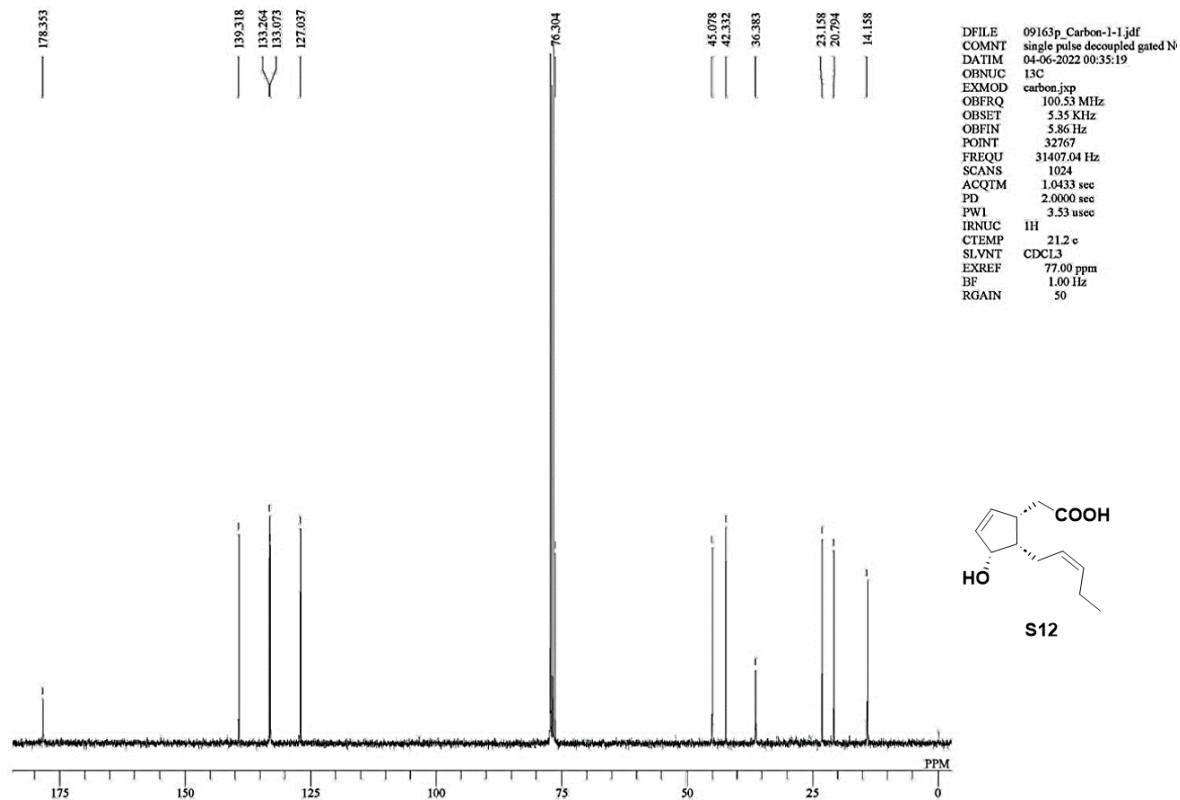

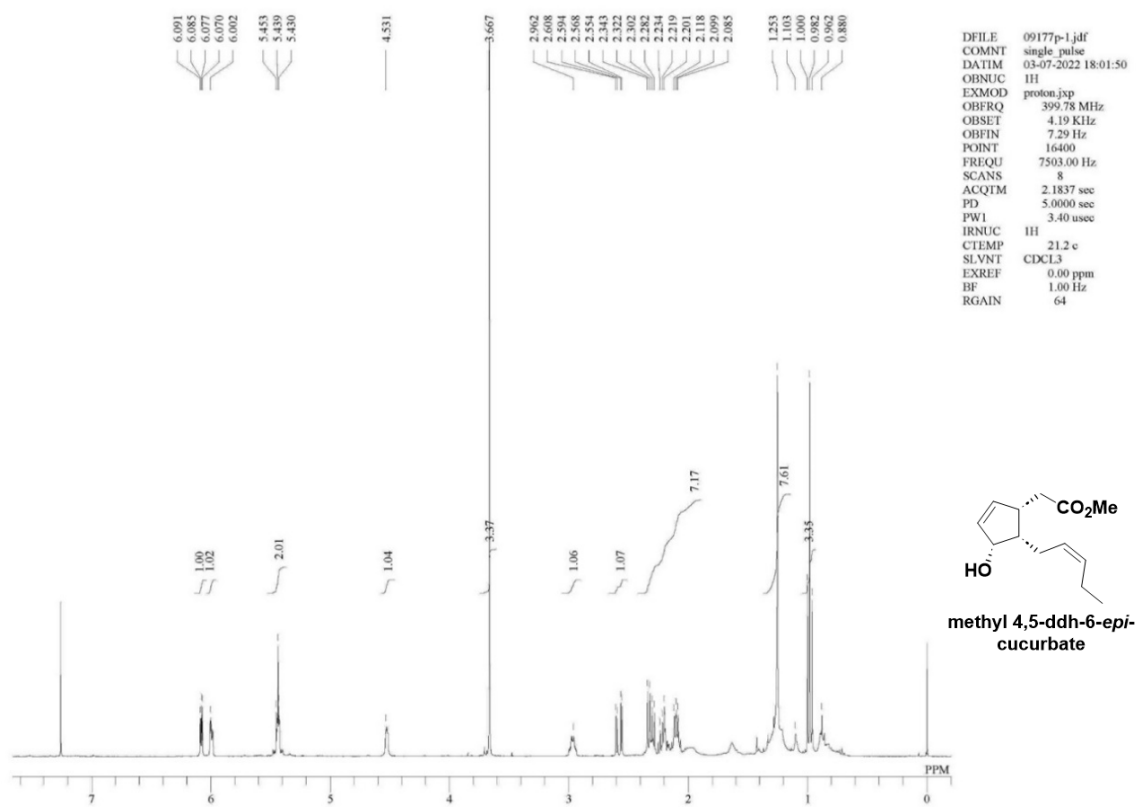

DFILE 09177p-1.jdf  
 COMNT single pulse  
 DATIM 03-07-2022 18:01:50  
 OBNUC 1H  
 EXMOD proton.jsp  
 OBFREQ 399.78 MHz  
 OBSET 4.19 KHz  
 OBFIN 7.29 Hz  
 POINT 16400  
 FREQU 7503.00 Hz  
 SCANS 8  
 ACQTM 2.1837 sec  
 PD 5.0000 sec  
 PW1 3.40 usec  
 IRNUC 1H  
 CTEMP 21.2 c  
 SLVNT CDCL3  
 EXREF 0.00 ppm  
 BF 1.00 Hz  
 RGAIN 64

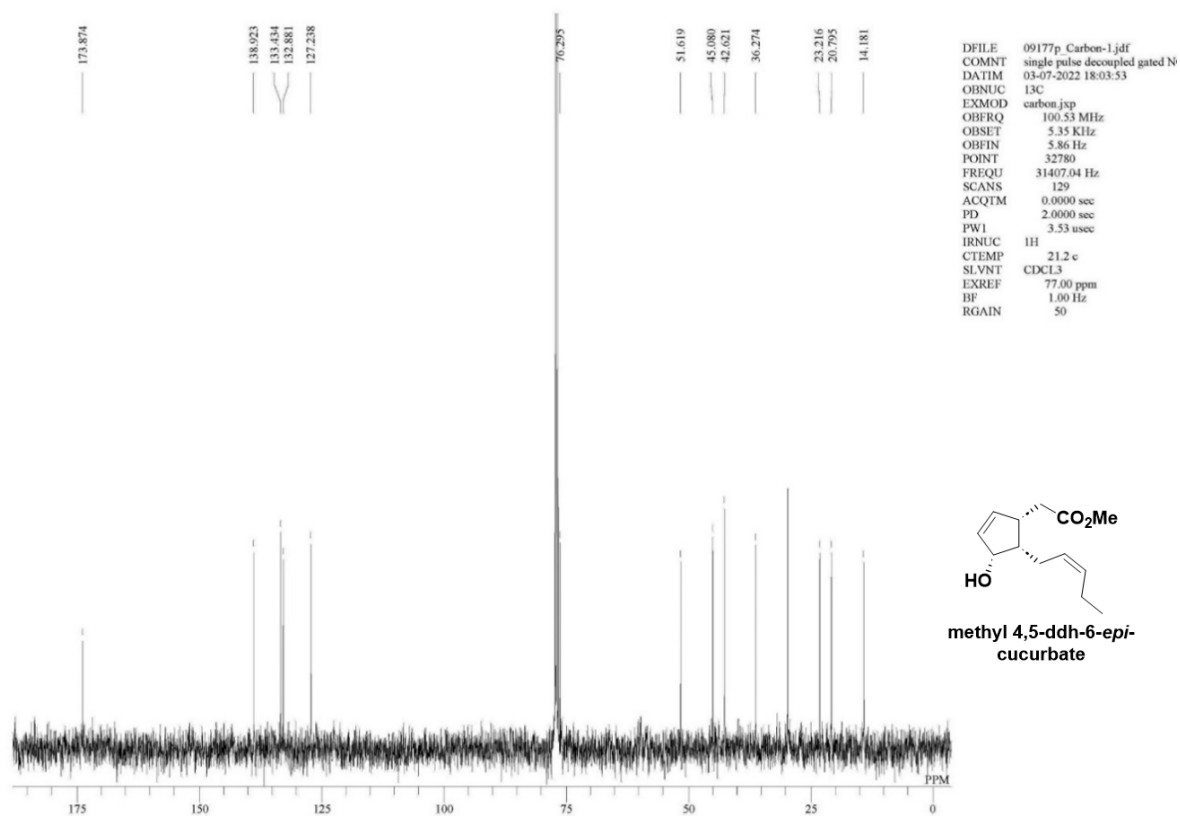

DFILE 09177p Carbon-1.jdf  
 COMNT single pulse decoupled gated N  
 DATIM 03-07-2022 18:03:53  
 OBNUC 13C  
 EXMOD carbon.jsp  
 OBFREQ 100.53 MHz  
 OBSET 5.35 KHz  
 OBFIN 5.86 Hz  
 POINT 32780  
 FREQU 31407.04 Hz  
 SCANS 129  
 ACQTM 0.0000 sec  
 PD 2.0000 sec  
 PW1 3.53 usec  
 IRNUC 1H  
 CTEMP 21.2 c  
 SLVNT CDCL3  
 EXREF 77.00 ppm  
 BF 1.00 Hz  
 RGAIN 50

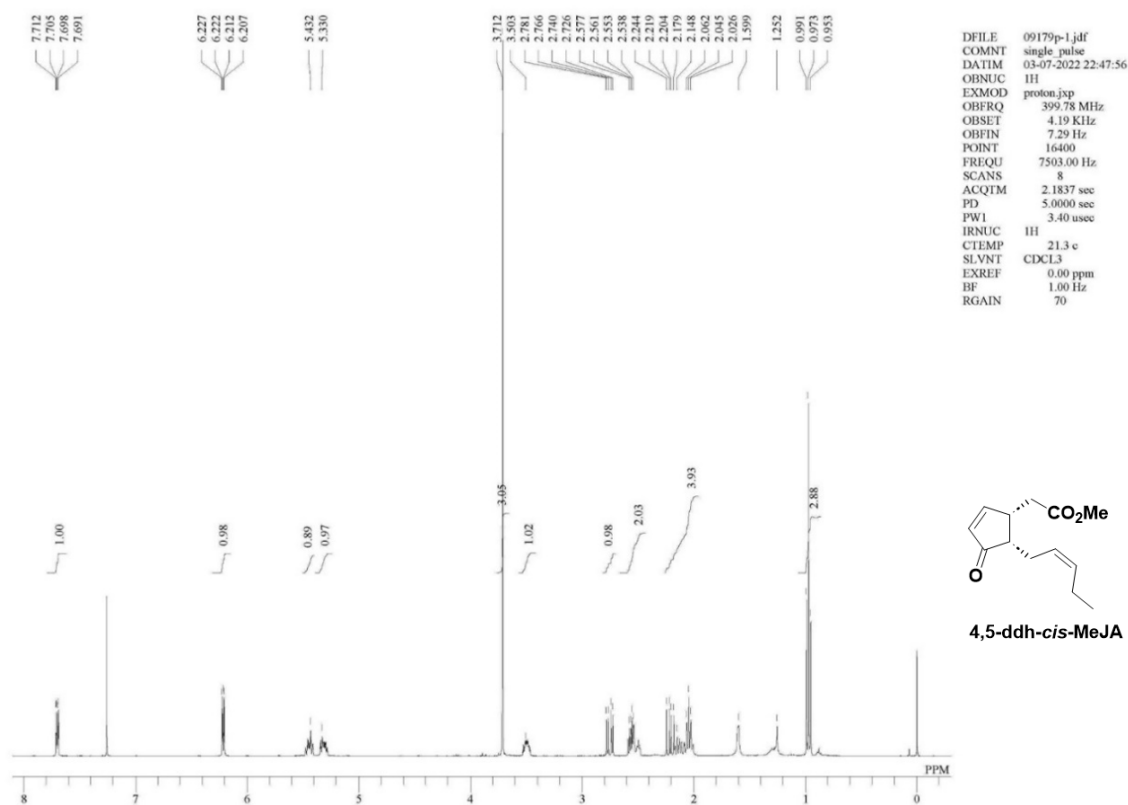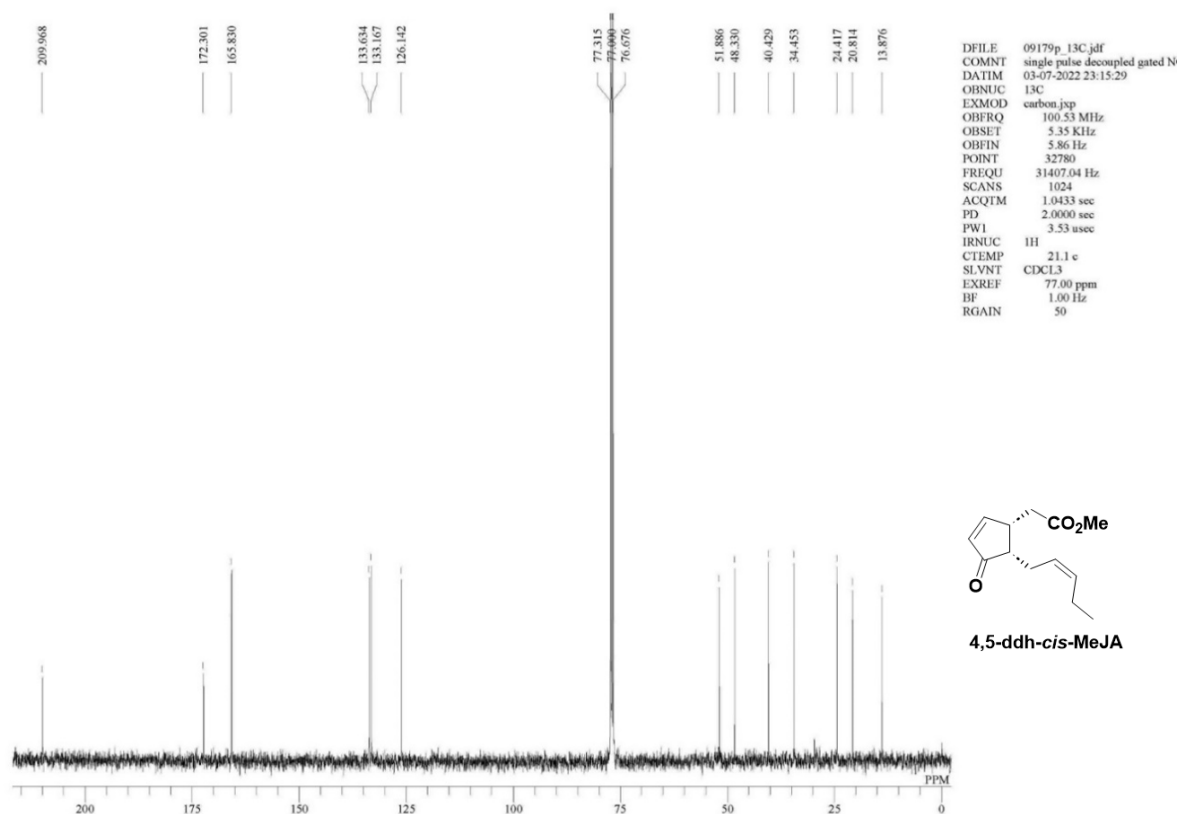

## Supplementary References

1. Wang, J., Sakurai, H., Kato, N., Kaji, T., and Ueda, M. (2021). Syntheses of dinor-*cis/iso*-12-oxo-phytodienoic acid (dn-*cis/iso*-OPDAs), ancestral jasmonate phytohormones of the bryophyte *Marchantia polymorpha* L., and their catabolites. *Scientific Reports* 11, 2033. doi: 10.1038/s41598-021-81575-z.
2. Nonaka, H., Ogawa, N., Maeda, N., Wang, Y. G., and Kobayashi, Y. (2010). Stereoselective synthesis of *epi*-jasmonic acid, tuberonic acid, and 12-oxo-PDA. *Org. Biomol. Chem.* **8**, 5212-5223. doi: 10.1039/C0OB00218F.
3. Endelmeier, I., Bülow, G., Woo, C., Decker, J., Raabe, G. and Gais, H. (2019). Cross-Coupling Reaction of Alkenyl Sulfoximines and Alkenyl Aminosulfoxonium Salts with Organozincs by Dual Nickel Catalysis and Lewis Acid Promotion. *Chem. Eur. J.* **25**, 5212-5223. doi: 10.1002/chem.201901163
